# Supplementary material for: Current Approaches to Light Conversion for Controlled Environment Agricultural Applications: A Review
Source: MDPI journal article supplement (doi:10.3390/horticulturae8100885), 2022-09-27
Supplement: s1 [file s1]

**Table S2.** Effect of photoconversion covers on plants growth.

| Reference | Base | Phosphor              | Excitation, nm     | Emission, nm | Features            | Plants                         | Growing conditions                                                                          | Effect on plants growth in comparison with control plants, %                                                                                                                                            |
|-----------|------|-----------------------|--------------------|--------------|---------------------|--------------------------------|---------------------------------------------------------------------------------------------|---------------------------------------------------------------------------------------------------------------------------------------------------------------------------------------------------------|
| [1]       | PE   | Lumogen * F-Red 300   | 400-480<br>500-590 | 590-700      | QY > 0.1 rel. units | <i>Tomatoes</i>                |                                                                                             | -Fruit weight +20%<br>-Number of flowers per branch +26%<br>-Flower weight 0%<br>-Number of juvenile branches per bush +37%                                                                             |
|           |      |                       |                    |              |                     | <i>Roses</i>                   |                                                                                             |                                                                                                                                                                                                         |
| [2]       | PE   | Red Dye               | 300-400            | 620-625      | QY=0,04 rel. units  | <i>Brassica oleracea</i>       |                                                                                             | <i>Brassica oleracea</i><br>-CO <sub>2</sub> absorption +100%<br>-Photosynthesis efficiency +7%<br>-Carboxylation efficiency -33%<br>-Electron transfer rate +17%<br>-Triose phosphate use rate +13%    |
|           |      |                       |                    |              |                     | <i>Lycopersicon esculentum</i> | -PPFD 350 $\mu\text{mol m}^{-2} \text{s}^{-1}$<br>-Temperature 28 °C<br>-Experiment 32 days | <i>Lycopersicon esculentum</i><br>-CO <sub>2</sub> absorption +100%<br>-Photosynthesis efficiency +95%<br>-Carboxylation efficiency -83%<br>-Electron transfer rate 0%<br>-Triose phosphate use rate 0% |
| [3]       | PE   | KSAN TA <sup>tm</sup> | 300-380            | 600-630      |                     | <i>Lycopersicon esculentum</i> |                                                                                             |                                                                                                                                                                                                         |
|           |      |                       |                    |              |                     | <i>Lactuca sativa</i>          |                                                                                             | -Yield <i>Lycopersicon esculentum</i> +39%<br>-Yield <i>Lactuca sativa</i> +45%                                                                                                                         |
| [4]       | PE   | Rhodamine 6G          | 460-560            | 500-620      | QY=0.05 rel. units  | <i>Anethum graveolens</i>      |                                                                                             | -Yield <i>Anethum graveolens</i> +28%                                                                                                                                                                   |
|           |      |                       |                    |              |                     | <i>Spinacia oleracea</i>       |                                                                                             | -Yield <i>Spinacia oleracea</i> +53%                                                                                                                                                                    |
| [4]       | PE   | Rhodamine 6G          | 460-560            | 500-620      | QY=0.05 rel. units  | <i>Brassica purpuraria</i>     | -Temperature 25 °C                                                                          | -Yield <i>Gossypium hirsutum</i> +10%<br>-Yield <i>Winter lettuce</i> +29%                                                                                                                              |

|     |                                 |                      |         |                               |                    |                                                     |                                                                                                                                    |
|-----|---------------------------------|----------------------|---------|-------------------------------|--------------------|-----------------------------------------------------|------------------------------------------------------------------------------------------------------------------------------------|
|     |                                 |                      |         |                               |                    | <i>Gossypium hirsutum</i>                           | <i>Brassica purpuraria</i> +40%<br><i>Capsicum annuum</i> +60%                                                                     |
|     |                                 | Rhodamine B          | 500-600 | 520-640                       | QY=0.11 rel. units | <i>Winter lettuce</i><br><br><i>Capsicum annuum</i> |                                                                                                                                    |
| [5] | Ethylenediacetal polymer resins | CP-636 Magenta       | 400-560 | 580-620                       |                    | <i>Fragaria ananassa</i>                            | CP-636 Magenta<br>-Fruit weight -6%<br>-Plant height +22%<br>-Number of pests -100%                                                |
|     |                                 | CP-636 Orange        | 400-520 | 580-620                       |                    | <i>Cucumis sativus</i>                              | CP-636 Orange<br>-Fruit weight 0%<br>-Plant height +18%<br>-Number of pests -75%                                                   |
| [6] | PE                              | Blue                 |         | 450                           |                    | <i>Fragaria ananassa</i>                            | Blue<br>-Fruit weight +11%<br>-Number of fruits +5%<br>-Dry weight 0%<br>-Sucrose content 0%<br>-Leaves number 0%<br>-Leaf area 0% |
|     |                                 | Red1<br>Red2<br>Red3 | 365     | 610-630<br>610-630<br>600-690 |                    |                                                     | Red<br>-Fruit weight +5%<br>-Number of fruits 0%<br>-Dry weight 0%<br>-Sucrose content 0%<br>-Leaves number -7%<br>-Leaf area -9%  |
| [7] | PE                              | RED                  | 350-450 | 600-700                       |                    |                                                     | RED<br>-Leaf area +9%<br>-Dry weight +8%<br>-Number of shoots +17%<br>-Stem length 0%                                              |
|     |                                 | BLUE                 | 350-450 | 450-500                       |                    | <i>Triticum durum</i>                               | BLUE<br>-Leaf area -32%<br>-Dry weight +5%<br>-Number of shoots -26%<br>-Stem length +27%                                          |
|     |                                 | RED-BLUE             | 350-450 | 450-500<br>600-700            |                    |                                                     | RED-BLUE<br>-Leaf area -33%<br>-Dry weight +8%<br>-Number of shoots 0%<br>-Stem length +25%                                        |
| [8] | - Ethylenediacetal vinyl        | Red (IAQ-DAS)        | 450-550 | 600-700                       |                    | <i>Raphanus sativus radicola</i>                    | <i>Raphanus sativus radicola</i><br>Red (IAQ-DAS)<br>-Leaf length 0%<br>-Shoot dry weight +15%                                     |

|      |                          |                       |                            |             |                                                                                                   |                                                                                                                             |                                                                                                                                                                                                 |
|------|--------------------------|-----------------------|----------------------------|-------------|---------------------------------------------------------------------------------------------------|-----------------------------------------------------------------------------------------------------------------------------|-------------------------------------------------------------------------------------------------------------------------------------------------------------------------------------------------|
|      | aceta<br>te<br>-<br>Dyes |                       |                            |             | <i>Allium<br/>fistulo<br/>sum</i>                                                                 | -Experiment 7<br>weeks                                                                                                      | -Root fresh weight<br>+100%<br>-Root dry weight +100%                                                                                                                                           |
|      |                          | Blue<br>(BFO–<br>BUT) | 350-<br>450                | 450-<br>550 |                                                                                                   |                                                                                                                             | <i>Raphanus sativus<br/>radicula</i><br>Blue (BFO–BUT)<br>-Leaf length +19%<br>-Shoot dry weight +30%<br>-Root fresh weight 0%<br>-Root dry weight 0%                                           |
|      |                          | Red<br>(IAQ–<br>DAS)  | 450-<br>550                | 600-<br>700 |                                                                                                   |                                                                                                                             | <i>Allium fistulosum</i><br>Red (IAQ–DAS)<br>-Leaf length 0%<br>-Shoot fresh weight<br>+27%<br>-Shoot dry weight +47%                                                                           |
|      |                          | Blue<br>(BFO–<br>BUT) | 350-<br>450                | 450-<br>550 |                                                                                                   |                                                                                                                             | <i>Allium fistulosum</i><br>Blue (BFO–BUT)<br>-Leaf length +16%<br>-Shoot fresh weight +9%<br>-Shoot dry weight +37%                                                                            |
| [9]  | Poly<br>styre<br>ne      | Red<br>dye            | 400-<br>550                | 600-<br>700 | <i>Cymbi<br/>dium<br/>finlays<br/>onianu<br/>m</i><br><i>Cymbi<br/>dium<br/>insign<br/>e</i>      | -Photoperiod<br>16 h<br>-PPFD 34<br>$\mu\text{mol m}^{-2} \text{s}^{-1}$<br>-Experiment<br>40 days                          | -Number of PLB<br>(protocorm like body)<br>+350%<br>-Fresh weight +190%                                                                                                                         |
| [10] | PE                       |                       | 320-<br>380                | 600-<br>640 | <i>Cucu<br/>mis<br/>sativus</i>                                                                   | -Temperature<br>25/18 °C<br>-Experiment 6<br>month                                                                          | -Shoot length +35%<br>-Leaves number +80%<br>-Leaf area +10%<br>-Number of fruits +64%<br>-Fruit weight +13%<br>-Yield +85%<br>-Ascorbic acid content<br>+35%<br>-Carbohydrate content -<br>10% |
| [11] | Poly<br>styre<br>ne      | RFF                   | 500-<br>550<br>300-<br>400 | 600-<br>700 | <i>Cymbi<br/>dium<br/>finlays<br/>onianu<br/>m</i><br><i>Phala<br/>enopsi<br/>s</i><br>«1327<br>» | -Photoperiod<br>16 h<br>-PPFD 34<br>$\mu\text{mol m}^{-2} \text{s}^{-1}$<br>-Temperature<br>25 °C<br>-Experiment<br>42 days | <i>Cymbidium<br/>finlaysonianum</i><br>RFF<br>-Fresh weight +120%<br>-Number of PLB +260%<br><i>Cymbidium<br/>finlaysonianum</i><br>BFF<br>-Fresh weight +250%<br>-Number of PLB +240%          |

|  |  |  |  |  |  |  |  |  |                                                                                                                                                                                           |
|--|--|--|--|--|--|--|--|--|-------------------------------------------------------------------------------------------------------------------------------------------------------------------------------------------|
|  |  |  |  |  |  |  |  |  | <i>Cymbidium<br/>finlaysonianum</i><br>YFF<br>-Fresh weight +71%<br>-Number of PLB +120%                                                                                                  |
|  |  |  |  |  |  |  |  |  | <i>Phalaenopsis «I327»</i><br>RFF<br>-Fresh weight +26%<br>-Number of PLB +90%                                                                                                            |
|  |  |  |  |  |  |  |  |  | <i>Phalaenopsis «I327»</i><br>BFF<br>-Fresh weight +16%<br>-Number of PLB +50%                                                                                                            |
|  |  |  |  |  |  |  |  |  | <i>Phalaenopsis «I327»</i><br>YFF<br>-Fresh weight +5%<br>-Number of PLB 0%                                                                                                               |
|  |  |  |  |  |  |  |  |  |                                                                                                                                                                                           |
|  |  |  |  |  |  |  |  |  | -Leaves number 0%<br>-Shoot length +50%<br>-Leaf area +35%<br>-Fresh weight +30%<br>-Dry weight +16%<br>-Ascorbic acid content +180%<br>-Hypocotyl length -100%                           |
|  |  |  |  |  |  |  |  |  | -Leaves number 0%<br>-Shoot length +25%<br>-Leaf area +25%<br>-Fresh weight +17%<br>-Dry weight +5%<br>-Ascorbic acid content +150%<br>-Catalase activity +40%                            |
|  |  |  |  |  |  |  |  |  |                                                                                                                                                                                           |
|  |  |  |  |  |  |  |  |  | F-16<br>-Shoot length 0%<br>-Leaf area +20%<br>-Dry weight +15%<br>-Photosynthesis efficiency +8%<br>-Chlorophyll a content 0%<br>-Chlorophyll b content 0%<br>-Carotenoids content - 22% |
|  |  |  |  |  |  |  |  |  | F-15<br>-Shoot length 0%<br>-Leaf area +45%<br>-Dry weight +15%<br>-Photosynthesis efficiency +16%<br>-Chlorophyll a content 0%<br>-Chlorophyll b content 0%                              |

|      |                     |     |         |         |                     |                 |                                                                                                                                                                                                                  |
|------|---------------------|-----|---------|---------|---------------------|-----------------|------------------------------------------------------------------------------------------------------------------------------------------------------------------------------------------------------------------|
|      |                     |     |         |         |                     |                 | -Carotenoids content 0%                                                                                                                                                                                          |
|      |                     |     |         |         |                     |                 | F-14                                                                                                                                                                                                             |
|      |                     |     |         |         |                     |                 | -Shoot length 0%                                                                                                                                                                                                 |
|      |                     |     |         |         |                     |                 | -Leaf area +40%                                                                                                                                                                                                  |
|      |                     |     |         |         |                     |                 | -Dry weight 0%                                                                                                                                                                                                   |
|      |                     |     |         |         |                     |                 | -Photosynthesis efficiency +30%                                                                                                                                                                                  |
|      |                     |     |         |         |                     |                 | -Chlorophyll a content -5%                                                                                                                                                                                       |
|      |                     |     |         |         |                     |                 | -Chlorophyll b content 0%                                                                                                                                                                                        |
|      |                     |     |         |         |                     |                 | -Carotenoids content -37%                                                                                                                                                                                        |
|      |                     |     |         |         |                     |                 | F-13                                                                                                                                                                                                             |
|      |                     |     |         |         |                     |                 | -Shoot length 0%                                                                                                                                                                                                 |
|      |                     |     |         |         |                     |                 | -Leaf area +60%                                                                                                                                                                                                  |
|      |                     |     |         |         |                     |                 | -Photosynthesis efficiency +15%                                                                                                                                                                                  |
|      |                     |     |         |         |                     |                 | -Chlorophyll a content -6%                                                                                                                                                                                       |
|      |                     |     |         |         |                     |                 | -Chlorophyll b content 0%                                                                                                                                                                                        |
|      |                     |     |         |         |                     |                 | -Carotenoids content -37%                                                                                                                                                                                        |
|      |                     |     |         |         |                     |                 | F-10                                                                                                                                                                                                             |
|      |                     |     |         |         |                     |                 | -Shoot length 0%                                                                                                                                                                                                 |
|      |                     |     |         |         |                     |                 | -Leaf area +100%                                                                                                                                                                                                 |
|      |                     |     |         |         |                     |                 | -Dry weight +60%                                                                                                                                                                                                 |
|      |                     |     |         |         |                     |                 | -Photosynthesis efficiency +70%                                                                                                                                                                                  |
|      |                     |     |         |         |                     |                 | -Chlorophyll a content 0%                                                                                                                                                                                        |
|      |                     |     |         |         |                     |                 | -Chlorophyll b content +14%                                                                                                                                                                                      |
|      |                     |     |         |         |                     |                 | -Carotenoids content 0%                                                                                                                                                                                          |
|      |                     |     |         |         |                     |                 | F-8                                                                                                                                                                                                              |
|      |                     |     |         |         |                     |                 | -Shoot length 0%                                                                                                                                                                                                 |
|      |                     |     |         |         |                     |                 | -Leaf area +20%                                                                                                                                                                                                  |
|      |                     |     |         |         |                     |                 | -Dry weight -8%                                                                                                                                                                                                  |
|      |                     |     |         |         |                     |                 | -Photosynthesis efficiency +12%                                                                                                                                                                                  |
|      |                     |     |         |         |                     |                 | -Chlorophyll a content -60%                                                                                                                                                                                      |
|      |                     |     |         |         |                     |                 | -Chlorophyll b content -43%                                                                                                                                                                                      |
|      |                     |     |         |         |                     |                 | -Carotenoids content -100%                                                                                                                                                                                       |
| [14] | Tetrafluoroethylene | AGC | 500-560 | 580-680 | QY=0,08<br>отн. ед. | Cucumis sativus | -Temperature 30/13 °C<br>-Experiment 8 month<br><br>-Fruit length 0%<br>-Fruit diameter 0%<br>-Fruit dry weight +8%<br>-Fruit weight 0%<br>-Number of fruits per plant +45%<br>-Yield +39%<br>-Fresh weight +41% |

|                                   |                               |                               |             |             |                       |                                                 |  |                               |                                   |
|-----------------------------------|-------------------------------|-------------------------------|-------------|-------------|-----------------------|-------------------------------------------------|--|-------------------------------|-----------------------------------|
|                                   |                               |                               |             |             |                       |                                                 |  | -Leaves fresh weight +49%     |                                   |
|                                   |                               |                               |             |             |                       |                                                 |  | -Leaves number per plant +17% |                                   |
|                                   |                               |                               |             |             |                       |                                                 |  | -Stem length 0%               |                                   |
| [15]                              | PE                            | NP<br>YVO <sub>4</sub> E<br>u | 320-<br>380 | 600-<br>640 | <i>Lactuca sativa</i> | -Temperature<br>28 °C<br>-Experiment<br>30 days |  | -Leaves number +36%           |                                   |
|                                   |                               |                               |             |             |                       |                                                 |  | -Fresh weight +60%            |                                   |
|                                   |                               |                               |             |             |                       |                                                 |  | -Dry weight +100%             |                                   |
|                                   |                               |                               |             |             |                       |                                                 |  | -Leaf area +50%               |                                   |
|                                   |                               |                               |             |             |                       |                                                 |  | -Ascorbic acid content +60%   |                                   |
| [16]                              | PE                            |                               | RED         | 290-<br>350 | 420-<br>490           | QY=0.543<br>rel. units                          |  | <i>Prunus persica</i><br>RED  |                                   |
|                                   |                               |                               |             |             |                       |                                                 |  | -Trunk area +44%              |                                   |
|                                   |                               |                               |             |             |                       |                                                 |  | -Shoot length +50%            |                                   |
|                                   |                               |                               |             |             |                       |                                                 |  | -CO2 absorption 0%            |                                   |
|                                   |                               |                               |             |             |                       |                                                 |  | -Stomatal conductance +22%    |                                   |
|                                   |                               |                               |             |             |                       |                                                 |  | -Transpiration rate +17%      |                                   |
|                                   |                               |                               |             |             |                       |                                                 |  | <i>Prunus persica</i><br>BLUE | -Trunk area +34%                  |
|                                   |                               |                               |             |             |                       |                                                 |  |                               | -Shoot length +22%                |
|                                   |                               |                               |             |             |                       |                                                 |  |                               | -CO2 absorption +6%               |
|                                   |                               |                               |             |             |                       |                                                 |  |                               | -Stomatal conductance +33%        |
|                                   |                               |                               |             |             |                       |                                                 |  |                               | -Transpiration rate +34%          |
|                                   |                               |                               |             |             |                       |                                                 |  |                               | <i>Prunus persica</i><br>RED-BLUE |
| -Shoot length+14%                 |                               |                               |             |             |                       |                                                 |  |                               |                                   |
| -CO2 absorption -32%              |                               |                               |             |             |                       |                                                 |  |                               |                                   |
| -Stomatal conductance -33%        |                               |                               |             |             |                       |                                                 |  |                               |                                   |
| -Transpiration rate -23%          |                               |                               |             |             |                       |                                                 |  |                               |                                   |
| <i>Prunus Cerasus</i><br>RED      | -Trunk area 0%                |                               |             |             |                       |                                                 |  |                               |                                   |
|                                   | -Shoot length+12%             |                               |             |             |                       |                                                 |  |                               |                                   |
|                                   | -CO2 absorption 0%            |                               |             |             |                       |                                                 |  |                               |                                   |
|                                   | -Stomatal conductance +18%    |                               |             |             |                       |                                                 |  |                               |                                   |
|                                   | -Transpiration rate +15%      |                               |             |             |                       |                                                 |  |                               |                                   |
|                                   | <i>Prunus Cerasus</i><br>BLUE | -Trunk area -24%              |             |             |                       |                                                 |  |                               |                                   |
| -Shoot length 0%                  |                               |                               |             |             |                       |                                                 |  |                               |                                   |
| -CO2 absorption +14%              |                               |                               |             |             |                       |                                                 |  |                               |                                   |
| -Stomatal conductance +45%        |                               |                               |             |             |                       |                                                 |  |                               |                                   |
| -Transpiration rate +16%          |                               |                               |             |             |                       |                                                 |  |                               |                                   |
| <i>Prunus Cerasus</i><br>RED-BLUE |                               | -Trunk area -27%              |             |             |                       |                                                 |  |                               |                                   |
|                                   | -Shoot length -10%            |                               |             |             |                       |                                                 |  |                               |                                   |

|      |               |                                                                        |         |                 |                                                         |                                                                                                               |                                                                                                     |                                                                                                                                                                                                 |
|------|---------------|------------------------------------------------------------------------|---------|-----------------|---------------------------------------------------------|---------------------------------------------------------------------------------------------------------------|-----------------------------------------------------------------------------------------------------|-------------------------------------------------------------------------------------------------------------------------------------------------------------------------------------------------|
|      |               |                                                                        |         |                 |                                                         |                                                                                                               |                                                                                                     | -CO <sub>2</sub> absorption -12%                                                                                                                                                                |
|      |               |                                                                        |         |                 |                                                         |                                                                                                               |                                                                                                     | -Stomatal conductance -10%                                                                                                                                                                      |
|      |               |                                                                        |         |                 |                                                         |                                                                                                               |                                                                                                     | -Transpiration rate 0%                                                                                                                                                                          |
| [17] | Polypropylene | NP<br>Y <sub>2</sub> O <sub>2</sub> S<br>Eu                            | 250-380 | 570-650-700-720 | particle size<br>3-5 μm<br>-QY=0.21-0.24 rel. units     | <i>Lactuca sativa</i><br><i>Brassica oleracea</i>                                                             | -PPFD 730 ± 80 μmol m <sup>-2</sup> s <sup>-1</sup><br>-Temperature 26/21 °C<br>-Experiment 28 days | -Photosynthesis efficiency +40%<br>-Plant biomass +40%<br>-Transpiration rate -40%<br>-WUE (water use efficiency) +47%                                                                          |
| [18] | Fluoropolymer | Cd <sub>0.6</sub> Zn <sub>0.4</sub> Se                                 | 375 nm  | 650 nm          | QY=0.17 rel. units                                      | <i>Capsicum annuum</i><br><i>Solanum melongena</i><br><i>Cucumis sativus</i><br><i>Solanum lycopersicum</i>   |                                                                                                     | -Leaf area<br><i>Cucumis sativus</i> +15%<br><i>Solanum melongena</i> +25%<br><i>Capsicum annuum</i> +30%<br><i>Solanum lycopersicum</i> +50%<br>-Fruit weight <i>Solanum lycopersicum</i> +20% |
| [19] | Fluoroplast   | NP:<br>Cd(1-x)<br>Zn(x)S<br>e                                          | 300-400 | 450-655         | Partical size<br>7 nm, 15 nm<br>QY=0.22-0.28 rel. units | <i>Capsicum annuum L</i><br><i>Solanum melongena</i><br><i>Cucumis sativus</i><br><i>Solanum lycopersicum</i> | -Experiment 5 weeks                                                                                 | -Leaf area +20-55%<br>-Fruit weight (tomatoes) + 15%                                                                                                                                            |
| [20] | PE            | NP<br>Sr <sub>2</sub> Si <sub>5</sub> N <sub>8</sub> :Eu <sup>2+</sup> | 313-421 | 550-700         | 500 nm                                                  | <i>Brassica rapa</i>                                                                                          | -Temperature 24/18 °C<br>-Experiment 10 days                                                        | -Plant height +24%<br>-Leaf length +15%<br>-Leaf width +15%<br>-Leaves number 0%<br>-Fresh weight +60%<br>-Dry weight +30%<br>-Carotenoid content +45%                                          |

|      |               |                                   |                    |         |                                                                                    |                             |                                                                                                                     |                                                                                                                                                                                                                                                                        |
|------|---------------|-----------------------------------|--------------------|---------|------------------------------------------------------------------------------------|-----------------------------|---------------------------------------------------------------------------------------------------------------------|------------------------------------------------------------------------------------------------------------------------------------------------------------------------------------------------------------------------------------------------------------------------|
|      |               |                                   |                    |         |                                                                                    |                             |                                                                                                                     | -Chlorophyll content +29%                                                                                                                                                                                                                                              |
|      |               |                                   |                    |         |                                                                                    |                             |                                                                                                                     | -Dissolved protein content +9%                                                                                                                                                                                                                                         |
|      |               |                                   |                    |         |                                                                                    |                             |                                                                                                                     | -Polyphenol content +21%                                                                                                                                                                                                                                               |
|      |               |                                   |                    |         |                                                                                    |                             |                                                                                                                     | -Dissolved sugar content +19,15%                                                                                                                                                                                                                                       |
| [21] | PE            | Dye GR                            | 400-480<br>500-600 | 570-650 | QY=0.376<br>rel. units                                                             | <i>Capsicum annuum</i>      | -PPFD 200 $\mu\text{mol m}^{-2} \text{s}^{-1}$<br>-Temperature 26 °C<br>-Experiment 25 days                         | <i>Capsicum annuum</i><br>-Photosynthesis efficiency +18%<br>-Leaves fresh weight +35%<br>-Leaves dry weight +43%<br>-Leaf area +30%                                                                                                                                   |
|      |               |                                   |                    |         |                                                                                    | <i>Lactuca sativa</i>       |                                                                                                                     | <i>Lactuca sativa</i><br>-Photosynthesis efficiency +18%<br>-Leaves fresh weight +32%<br>-Leaves dry weight +29%<br>-Leaf area +32%                                                                                                                                    |
| [22] | PE            | Dye GtR                           | 530-560            | 610-680 | QY=0,034<br>rel. units                                                             | <i>Capsicum annuum</i>      | -PPFD 2300 $\mu\text{mol m}^{-2} \text{s}^{-1}$<br>-Temperature 26 °C<br>-Experiment 45 days                        | -Stem length +8%<br>-Stem diameter 0%<br>-Number of shoots 0%<br>-Leaves number +13%<br>-Fresh weight +20%<br>-Dry weight +20%<br>-Number of fruits 0%<br>-Internodes length 0%<br>-Leaf length 0%<br>-Leaf width 0%<br>-Leaf area+6%<br>-Photosynthesis efficiency 0% |
| [23] | Acrylic resin | CuInS <sub>2</sub> /ZnS QD-Orange | 440                | 550-650 | QY=0.15-0.2 rel. units                                                             | <i>Lactuca sativa</i>       | -Photoperiod 14 h<br>-PPFD 380 $\mu\text{mol m}^{-2} \text{s}^{-1}$<br>-Temperature 24/20 °C<br>-Experiment 28 days | QD-Orange<br>-Leaf area +8%<br>-Fresh weight +11%<br>-Dry weight +13%<br>-Photosynthesis efficiency +5,6%<br>QD-Red<br>-Leaf area +13%<br>-Fresh weight +11%<br>-Dry weight +8,7%<br>-Photosynthesis efficiency +17,6%                                                 |
| [24] | PE            | Lumogen Red (LR305)               | 400-480            | 550-680 | Photonic Crystal SiO <sub>2</sub> /TiO <sub>2</sub> for reflection IR 1000-1600 nm | <i>Solanum lycopersicum</i> | -Photoperiod 16 h<br>-PPFD 400 $\mu\text{mol m}^{-2} \text{s}^{-1}$<br>-Temperature 24/20 °C                        | <i>Solanum lycopersicum</i><br>-Stem length +13%<br>-Leaves number +6%<br><i>Lactuca sativa</i><br>-Fresh weight +12%<br>-Stem fresh weight +100%                                                                                                                      |



|  |  |  |  |  |  |  |                                      |
|--|--|--|--|--|--|--|--------------------------------------|
|  |  |  |  |  |  |  | -Stem dry weight +35%                |
|  |  |  |  |  |  |  | -Leaf area +91%                      |
|  |  |  |  |  |  |  | <i>Lactuca sativa</i>                |
|  |  |  |  |  |  |  | -Breathing rate 0%                   |
|  |  |  |  |  |  |  | -Maximum rate of photosynthesis +9%  |
|  |  |  |  |  |  |  | -Fresh weight 0%                     |
|  |  |  |  |  |  |  | -Dry weight -30%                     |
|  |  |  |  |  |  |  | -Chlorophyll content -6%             |
|  |  |  |  |  |  |  | -Leaf area 0%                        |
|  |  |  |  |  |  |  | -Leaf length +22%                    |
|  |  |  |  |  |  |  | -Leaf width 0%                       |
|  |  |  |  |  |  |  | -Plant height +33%                   |
|  |  |  |  |  |  |  | <i>Brassica rapa</i>                 |
|  |  |  |  |  |  |  | -Breathing rate -67%                 |
|  |  |  |  |  |  |  | -Maximum rate of photosynthesis +23% |
|  |  |  |  |  |  |  | -Fresh weight 0%                     |
|  |  |  |  |  |  |  | -Dry weight -18%                     |
|  |  |  |  |  |  |  | -Chlorophyll content 0%              |
|  |  |  |  |  |  |  | -Leaf area 0%                        |
|  |  |  |  |  |  |  | -Leaf length+6%                      |
|  |  |  |  |  |  |  | -Leaf width 0%                       |
|  |  |  |  |  |  |  | -Plant height-15%                    |
|  |  |  |  |  |  |  | <i>Cucumis sativus</i>               |
|  |  |  |  |  |  |  | -Breathing rate -35%                 |
|  |  |  |  |  |  |  | -Maximum rate of photosynthesis +19% |
|  |  |  |  |  |  |  | -Fresh weight 0%                     |
|  |  |  |  |  |  |  | -Dry weight 0%                       |
|  |  |  |  |  |  |  | -Chlorophyll content +7%             |
|  |  |  |  |  |  |  | -Leaf area+14%                       |
|  |  |  |  |  |  |  | -Leaf length 0%                      |
|  |  |  |  |  |  |  | -Leaf width 0%                       |
|  |  |  |  |  |  |  | -Plant height -32%                   |

NP – nanoparticles, QY – quantum yield, PE – polyethylene, IR – infrared radiation, WUE – water use efficiency, PLB – protocorm like body.

## References

1. Novoplansky, A.; Sachs, T.; Cohen, D.; Bar, R.; Bodenheimer, J.; Reisfeld, R. Increasing Plant Productivity by Changing the Solar Spectrum. *Solar Energy Materials* **1990**, *21*, 17–23, doi:10.1016/0165-1633(90)90039-4.
2. Kosobryukhov, A.A.; Kreslavskii, V.D.; Khramov, R.N. Effect of Additional Low Intensity Luminescence Radiation 625 Nm on Plant Growth and Photosynthesis Useful Sun for Crop Yields View Project ROS Sensing and Monitoring View Project. *Biotronics* **2000**, *29*, 23–31.
3. Edser, C. Light Manipulating Additives Extend Opportunities for Agricultural Plastic Films. *Plastics, Additives and Compounding* **2002**, *4*, 20–24, doi:10.1016/S1464-391X(02)80079-4.
4. Ke-li, Z.; Liang-jie, Y.; Mei-yun, X.; You-zu, Y.; Ju-tang, S. The Application of Lights-Converted Polyethylene Film for Agriculture. *Wuhan University Journal of Natural Sciences* **2002**, *7*, 365–367, doi:10.1007/BF02912162.
5. González, A.; Rodríguez, R.; Bañón, S.; Franco, J.A.; Fernández, J.A.; Salmerón, A.; Espí, E. Strawberry and Cucumber Cultivation under Fluorescent Photosensitive Plastic Films Cover. *Acta Horticulturae* **2003**, *614*, 407–413, doi:10.17660/ACTAHORTIC.2003.614.61.
6. Hemming, S.; Van Os, E. A.; Hemming, J.; Dieleman, J. A. The Effect of New Developed Fluorescent Greenhouse Films on the Growth of *Fragaria* × *Ananassa* “Elsanta.” *European Journal of Horticultural Science* **2006**, *71*, 145–154.
7. de Salvador, F.R.; Mugnozza, G.S.; Vox, G.; Schettini, E.; Mastroilli, M.; Bou Jaoudé, M. Innovative Photosensitive and Photoluminescent Plastic Films for Protected Cultivation. *Acta Horticulture* **2008**, *801*, 115–121.
8. Hidaka, K.; Yoshida, K.; Shimasaki, K.; Murakami, K.; Yasutake, D.; Kitano, M. Spectrum Conversion Film for Regulation of Plant Growth. *Journal of the Faculty of Agriculture, Kyushu University* **2008**, *53*, 549–552, doi:10.5109/12872.
9. Hamada, K.; Shimasaki, K.; Ogata, T.; Nishimura, Y.; Nakamura, K.; Oyama-Egawa, H.; Yoshida, K. Effects of Spectral Composition Conversion Film and Plant Growth Regulators on Proliferation of Cymbidium Protocorm Like Body (PLB) Cultured In Vitro. *Environmental Control in Biology* **2010**, *48*, 127–132, doi:10.2525/ECB.48.127.
10. Minich, A.S.; Minich, I.B.; Zelenchukova, N.S.; Raida, V.S. Feature of growth and productivity in cucumber hybrids during growing under photoluminescent and hydrophilic films. *Agricultural biology* **2010**, *1*, 81–85.
11. Hamada, K.; Shimasaki, K.; Nishimura, Y.; Oyama-Egawa, H.; Yoshida, K. Effects of Red, Blue and Yellow Fluorescent Films on Proliferation and Organogenesis in Cymbidium and Phalaenopsis PLB in Vitro. *Acta Horticulturae* **2011**, *907*, 381–384, doi:10.17660/ACTAHORTIC.2011.907.63.
12. Minich, A. S.; Minich, I. B.; Shaitarova, O. V.; Permyakova, N. L.; Zelenchukova, N. S.; Ivanitskiy, A. E.; Ivlev, G. A. Vital activity of *Lactuca sativa* and soil microorganisms under fluorescent films. *TSPU Bulletin* **2011**, *8*(110).
13. Golovatskaya, I.F.; Minich, A.S.; Bolshakova, M.A. Regulation and development of Brassica oleracea plants growth with the help of sunlight correction. *Tomsk State University Journal of Biology* **2012**, *2*, 151–165.
14. Nishimura, Y.; Wada, E.; Fukumoto, Y.; Aruga, H.; Shimoi, Y. The Effect of Spectrum Conversion Covering Film on Cucumber in Soilless Culture. *Acta Horticulturae* **2012**, *956*, 481–487, doi:10.17660/ACTAHORTIC.2012.956.56.
15. Zelenchukova, N.S.; Ivanitsky, A.E.; Agaeva, S.A.; Tishkina, V.N. Productivity, ascorbic acid synthesis and catalase activity in *Lactuca Sativa* L. leaves under Plastic films. *TSPU Bulletin* **2013**, *8*, 55–59.
16. Schettini, E.; de Salvador, F.R.; Scarascia-Mugnozza, G.; Vox, G. Radiometric Properties of Photosensitive and Photoluminescent Greenhouse Plastic Films and Their Effects on Peach and Cherry Tree Growth. **2015**, *86*, 79–83, doi:10.1080/14620316.2011.11512729.
17. Kosobryukhov, A.A.; Svidchenko, E.A.; Surin, N.M.; Khramov, R.N.; Kreslavski, V.D. Influence of Photoluminophore-Modified Agro Textile Spunbond on Growth and Photosynthesis of Cabbage and Lettuce Plants. *Optics Express* **2019**, *27*, 31967–31977, doi:10.1364/OE.27.031967.
18. Ivanyuk, V. V.; Shkirin, A. V.; Belosludtsev, K.N.; Dubinin, M. V.; Kozlov, V.A.; Bunkin, N.F.; Dorokhov, A.S.; Gudkov, S. V. Influence of Fluoropolymer Film Modified with Nanoscale Photoluminophor on Growth and Development of Plants. *Frontiers in Physics* **2020**, *8*, 1–6, doi:10.3389/FPHY.2020.616040

19. Simakin, A. V.; Ivanyuk, V. V.; Dorokhov, A.S.; Gudkov, S. V. Photoconversion Fluoropolymer Films for the Cultivation of Agricultural Plants Under Conditions of Insufficient Insolation. *Applied Sciences* **2020**, *10*, 8025, doi:10.3390/APP10228025.
20. Wu, W.; Zhang, Z.; Dong, R.; Xie, G.; Zhou, J.; Wu, K.; Zhang, H.; Cai, Q.; Lei, B. Characterization and Properties of a Sr<sub>2</sub>Si<sub>5</sub>N<sub>8</sub>:Eu<sup>2+</sup>-Based Light-Conversion Agricultural Film. *Journal of Rare Earths* **2020**, *38*, 539–545, doi:10.1016/J.JRE.2020.01.020.
21. Yoon, H.I.; Kim, J.H.; Park, K.S.; Namgoong, J.W.; Hwang, T.G.; Kim, J.P.; Son, J.E. Quantitative Methods for Evaluating the Conversion Performance of Spectrum Conversion Films and Testing Plant Responses under Simulated Solar Conditions. *Horticulture Environment and Biotechnology* **2020**, *61*, 999–1009, doi:10.1007/S13580-020-00286-Y/TABLES/3.
22. Yoon, H.I.; Kang, J.H.; Kang, W.H.; Son, J.E. Subtle changes in solar radiation under a green-to-red conversion film affect the photosynthetic performance and chlorophyll fluorescence of sweet pepper. *Photosynthetica* **2020**, *58*, 1107–1115. <https://doi.org/10.32615/ps.2020.057>
23. Parrish, C.H.; Hebert, D.; Jackson, A.; Ramasamy, K.; McDaniel, H.; Giacomelli, G.A.; Bergren, M.R. Optimizing Spectral Quality with Quantum Dots to Enhance Crop Yield in Controlled Environments. *Communications Biology* **2021** *4*:1 **2021**, *4*, 1–9, doi:10.1038/s42003-020-01646-1.
24. Sánchez-Lanuza, M.B.; Menéndez-Velázquez, A.; Peñas-Sanjuan, A.; Navas-Martos, F.J.; Lillo-Bravo, I.; Delgado-Sánchez, J.M. Advanced Photonic Thin Films for Solar Irradiation Tuneability Oriented to Greenhouse Applications. *Materials* **2021**, *14*, 2357, doi:10.3390/MA14092357.
25. Yoon, H. I.; Kang, J. H.; Kim, D.; Son, J. E. Seedling Quality and Photosynthetic Characteristic of Vegetables Grown Under a Spectrum Conversion Film. *Journal of Bio-Environment Control* **2021**, *30*, 110–117, doi:10.12791/KSBEC.2021.30.2.110.
