# Supplementary material for: Current Approaches to Light Conversion for Controlled Environment Agricultural Applications: A Review
Source: MDPI journal article supplement (doi:10.3390/horticulturae8100885), 2022-09-27
Supplement: s1 [file s1]

**Table S1.** Effect of photoselective covers on plants growth.

| Reference | Base | Dye                                           | Absorption wavelength range, nm | Plants                            | Growing conditions                                                                                                | Effect on plants growth in comparison with control plants, %                                                                                                            |
|-----------|------|-----------------------------------------------|---------------------------------|-----------------------------------|-------------------------------------------------------------------------------------------------------------------|-------------------------------------------------------------------------------------------------------------------------------------------------------------------------|
| [1]       | PE   | Red Dye #259                                  | 400-550                         | <i>Dendranthem a grandiflorum</i> | -Photoperiod 16 h<br>-PPFD 1700 $\mu\text{mol m}^{-2} \text{s}^{-1}$<br>-Temperature 28 °C<br>-Experiment 4 weeks | Red Dye #259<br>-Internodes length +6%<br>-Chlorophyll content -8%<br>-Leaf area +5%                                                                                    |
|           |      | Blue Dye #178                                 | 550-750                         |                                   |                                                                                                                   | Blue Dye #178<br>-Internodes length 0%<br>-Chlorophyll content 0%<br>-Leaf area 0%                                                                                      |
|           |      | $\text{CuSO}_4 \cdot 5\text{H}_2\text{O}$     | >700                            |                                   |                                                                                                                   | $\text{CuSO}_4 \cdot 5\text{H}_2\text{O}$<br>-Internodes length -40%<br>-Chlorophyll content +39%<br>-Leaf area 0%                                                      |
| [2]       | PP   | 6% $\text{CuSO}_4 \cdot 5\text{H}_2\text{O}$  | 700-800                         | <i>Dendranthema grandiflorum</i>  | -Photoperiod 12 h<br>-PPFD 1500 $\mu\text{mol m}^{-2} \text{s}^{-1}$<br>-Temperature 28 °C<br>-Experiment 28 days | 6% $\text{CuSO}_4 \cdot 5\text{H}_2\text{O}$<br>-Plant height -30%<br>-Internodes length -33%<br>-Dry weight -29%<br>-Leaves dry weight -13%<br>-Stem dry weight -100%  |
|           |      | 40% $\text{CuSO}_4 \cdot 5\text{H}_2\text{O}$ | 600-800                         |                                   |                                                                                                                   | 40% $\text{CuSO}_4 \cdot 5\text{H}_2\text{O}$<br>-Plant height -33%<br>-Internodes length -31%<br>-Dry weight -39%<br>-Leaves dry weight -32%<br>-Stem dry weight -100% |
|           |      | 4% $\text{CuSO}_4 \cdot 5\text{H}_2\text{O}$  | >800 nm                         |                                   |                                                                                                                   | 4% $\text{CuSO}_4 \cdot 5\text{H}_2\text{O}$<br>-Plant height -35%                                                                                                      |
| [3]       | PP   | 4% $\text{CuSO}_4 \cdot 5\text{H}_2\text{O}$  | >800 nm                         | <i>Dendranthem a grandiflorum</i> | -Photoperiod 16 h<br>-PPFD 950 $\mu\text{mol m}^{-2} \text{s}^{-1}$                                               | 4% $\text{CuSO}_4 \cdot 5\text{H}_2\text{O}$<br>-Plant height -35%                                                                                                      |

|  |  |                        |                                      |
|--|--|------------------------|--------------------------------------|
|  |  | -Temperature<br>26 °C  | -Leaves number<br>-5%                |
|  |  | -Experiment<br>28 days | -Internodes<br>length -33%           |
|  |  |                        | -Leaf area -25%                      |
|  |  |                        | -Leaves fresh<br>weight -20%         |
|  |  |                        | -Stem fresh<br>weight -100%          |
|  |  |                        | -Dry weight -<br>32%                 |
|  |  |                        | -Leaves dry<br>weight -22%           |
|  |  |                        | -Stem dry<br>weight -100%            |
|  |  |                        | -Root dry<br>weight 0%               |
|  |  |                        | -Chlorophyll<br>content +14%         |
|  |  |                        | 8%                                   |
|  |  |                        | CuSO <sub>4</sub> *5H <sub>2</sub> O |
|  |  |                        | -Plant height -<br>40%               |
|  |  |                        | -Leaves number<br>-12%               |
|  |  |                        | -Internodes<br>length -40%           |
|  |  |                        | -Leaf area -37%                      |
|  |  |                        | -Leaves fresh<br>weight -35%         |
|  |  |                        | -Stem fresh<br>weight -160%          |
|  |  |                        | -Dry weight -<br>45%                 |
|  |  |                        | -Leaves dry<br>weight -37%           |
|  |  |                        | -Stem dry<br>weight -200%            |
|  |  |                        | -Root dry<br>weight 0%               |
|  |  |                        | -Chlorophyll<br>content 0%           |
|  |  |                        | 16%                                  |
|  |  |                        | CuSO <sub>4</sub> *5H <sub>2</sub> O |
|  |  |                        | -Plant height -<br>38%               |
|  |  |                        | -Leaves`<br>number -12%              |
|  |  |                        | -Internodes<br>length -33%           |
|  |  |                        | -Leaf area -33%                      |
|  |  |                        | -Leaves fresh<br>weight -29%         |
|  |  |                        | -Stem fresh<br>weight -200%          |
|  |  |                        | -Dry weight -<br>40%                 |
|  |  |                        | -Leaves dry<br>weight -31%           |
|  |  |                        | -Stem dry<br>weight -150%            |

8%  
CuSO<sub>4</sub>\*5H<sub>2</sub>O  
>750 nm

16%  
CuSO<sub>4</sub>\*5H<sub>2</sub>O  
>700 nm

|     |    |                                                 |         |                                |                                                                                                                    |                                                                                                                                                                                                                                                                                                                  |
|-----|----|-------------------------------------------------|---------|--------------------------------|--------------------------------------------------------------------------------------------------------------------|------------------------------------------------------------------------------------------------------------------------------------------------------------------------------------------------------------------------------------------------------------------------------------------------------------------|
|     |    |                                                 |         |                                |                                                                                                                    | -Root dry weight 0%<br>-Chlorophyll content +8%                                                                                                                                                                                                                                                                  |
| [4] | PP | 6%<br>$\text{CuSO}_4 \cdot 5\text{H}_2\text{O}$ | >750    | <i>Rosa hybrida</i>            | -Photoperiod 13.5 h<br>-PPFD 850 $\mu\text{mol m}^{-2} \text{s}^{-1}$<br>-Temperature 34 °C<br>-Experiment 5 weeks | -Plant height -17%<br>-Internodes length -18%<br>-Number of shoots -9%<br>-Days to bloom +15%<br>-Flower diameter -14%<br>-Amount of sucrose:<br>leaf -40%<br>stem -7%<br>-Glucose content:<br>leaf -11%<br>stem -20%<br>-Fructose content:<br>leaf 0%<br>stem 0%<br>-Starch content:<br>leaf -180%<br>stem -17% |
| [5] | PE | Rabs                                            | 550-750 | <i>Cucumis sativus</i>         | -Photoperiod 12 h<br>-PPFD 300 $\mu\text{mol m}^{-2} \text{s}^{-1}$<br>-Temperature 28 °C<br>-Experiment 28 days   | <i>C. sativus</i><br>Rabs<br>-Buds size 8%<br>-Fresh weight +19%<br>-Plant height +27%<br>-Leaves number 0%<br>-Leaf area+9%                                                                                                                                                                                     |
|     |    | FRabs                                           | 650-800 |                                |                                                                                                                    | <i>C. sativus</i><br>FRabs<br>-Buds size -13%<br>-Fresh weight -9%<br>-Plant height -16%<br>-Leaves number 0%<br>-Leaf area -20%                                                                                                                                                                                 |
|     |    | Rabs                                            | 550-750 | <i>Lycopersicon esculentum</i> |                                                                                                                    | <i>Lycopersicon esculentum</i><br>Rabs<br>-Buds size 0%                                                                                                                                                                                                                                                          |

|     |                    |                                              |                           |                                                          |                                                                                                                        |                                                                                                                                                                                                                               |
|-----|--------------------|----------------------------------------------|---------------------------|----------------------------------------------------------|------------------------------------------------------------------------------------------------------------------------|-------------------------------------------------------------------------------------------------------------------------------------------------------------------------------------------------------------------------------|
|     |                    |                                              |                           |                                                          |                                                                                                                        | -Fresh weight +16%                                                                                                                                                                                                            |
|     |                    |                                              |                           |                                                          |                                                                                                                        | -Plant height +23%                                                                                                                                                                                                            |
|     |                    |                                              |                           |                                                          |                                                                                                                        | -Leaves number +8%                                                                                                                                                                                                            |
|     |                    |                                              |                           |                                                          |                                                                                                                        | -Leaf area +14%                                                                                                                                                                                                               |
|     |                    |                                              |                           |                                                          |                                                                                                                        | <i>Lycopersicon esculentum</i>                                                                                                                                                                                                |
|     |                    |                                              |                           |                                                          |                                                                                                                        | FRabs                                                                                                                                                                                                                         |
|     |                    |                                              |                           |                                                          |                                                                                                                        | -Buds size 0%                                                                                                                                                                                                                 |
|     |                    |                                              |                           |                                                          |                                                                                                                        | -Fresh weight -9%                                                                                                                                                                                                             |
|     |                    |                                              |                           |                                                          |                                                                                                                        | -Plant height -13%                                                                                                                                                                                                            |
|     |                    |                                              |                           |                                                          |                                                                                                                        | -Leaves number 0%                                                                                                                                                                                                             |
|     |                    |                                              |                           |                                                          |                                                                                                                        | -Leaf area-14%                                                                                                                                                                                                                |
| [6] | PE                 | Zinc phthalocyanine<br>Copper phthalocyanine | 700-760                   | <i>Dendranthem a grandiflorum</i><br><i>Antirrhinums</i> | -Temperature 18 °C.                                                                                                    | <i>D. grandiflorum</i><br>-Plant height 0%<br>-Leaves number 0%<br>-Leaf area -5%<br>-Internodes length +40%<br><i>Antirrhinums</i><br>-Plant height +15%<br>-Leaves number -9%<br>-Leaf area -25%<br>-Internodes length +26% |
| [7] | Polymethylacrylate | No-B<br>No-R                                 | <520 >700<br><400 650-760 | <i>Vaccinium corymbosum</i>                              | -Photoperiod 16 h<br>-PPFD 55-115 μmol m <sup>-2</sup> s <sup>-1</sup><br>-Temperature 24 °C<br>-Experiment 60 days    | No-B-PMMA<br>-Number of shoots +55%<br>-Shoot length +30%<br>No-R-PMMA<br>-Number of shoots +25%<br>-Shoot length 0%                                                                                                          |
| [8] | PE                 | Blue 1%                                      | 550-750                   | <i>Chrysanthemum morifolium</i>                          | -Photoperiod 16 h<br>-PPFD 50-200 μmol m <sup>-2</sup> s <sup>-1</sup><br>-Temperature 21/19 °C<br>-Experiment 5 weeks | Blue 1%<br>-Plant height -11%<br>-Leaves number -5%<br>-Internodes length -6%<br>-Dry weight -5%<br>-Leaf area of main stem -8%<br>-Leaf area axillary shoots -25%                                                            |

|      |    |           |                     |                                                                 |                                                                                                                     |                                                                                                                                                             |
|------|----|-----------|---------------------|-----------------------------------------------------------------|---------------------------------------------------------------------------------------------------------------------|-------------------------------------------------------------------------------------------------------------------------------------------------------------|
|      |    |           |                     |                                                                 | Blue 2%                                                                                                             | -Plant height -14%<br>-Leaves number -12%<br>-Internodes length -4%<br>-Dry weight -8%<br>-Leaf area of main stem -23%<br>-Leaf area axillary shoots -38%   |
|      |    |           |                     |                                                                 | Blue 3%                                                                                                             | -Plant height -22%<br>-Leaves` number -16%<br>-Internodes length -10%<br>-Dry weight -8%<br>-Leaf area of main stem -30%<br>-Leaf area axillary shoots -55% |
| [9]  | PE | YCE-1 #80 | 700-800<br>900-1000 | <i>Dendranthem a grandiflorum</i><br><br><i>Capsicum annuum</i> | -Photoperiod 16 h<br>-PPFD 620 $\mu\text{mol m}^{-2} \text{s}^{-1}$<br>-Temperature 28/22 °C<br>-Experiment 28 days | -Stem length from -10% to -35%<br>-Leaf area from +8% to +25%<br>-Dry weight from +10% to +100%                                                             |
|      |    |           |                     |                                                                 | SCE-4                                                                                                               | -Plant height +14%<br>-<br>Height/Diameter +13%<br>-Shoot height +8%<br>-Internodes length +7%<br>-Time to first flower bud 0%<br>-Time to first bloom 0%   |
| [10] | PE |           | SCE-4               | 550-750                                                         | <i>Petunia hybrida</i><br><br><i>Pisum sativum</i>                                                                  | -Photoperiod 12 h<br>-Temperature 23,5 °C                                                                                                                   |
|      |    |           |                     |                                                                 | YCE-1                                                                                                               | -Plant height -19%<br>-<br>Height/Diameter -19%<br>-Shoot height -15%<br>-Internodes length -13%                                                            |
|      |    |           |                     |                                                                 | YCE-1                                                                                                               | 650-700<br>720-820                                                                                                                                          |

|  |  |  |  |  |  |  |  |  |  |  |  |  |  |  |  |  |  |  |  |  |  |  |  |  |  |  |  |  |  |  |  |  |  |  |  |  |  |  |  |  |  |  |  |  |  |  |  |  |  |  |  |  |  |  |  |  |  |  |  |  |  |  |  |  |  |  |  |  |  |  |  |  |  |  |  |  |  |  |  |  |  |  |  |  |  |  |  |  |  |  |  |  |  |  |  |  |  |  |  |  |  |  |  |  |  |  |  |  |  |  |  |  |  |  |  |  |  |  |  |  |  |  |  |  |  |  |  |  |  |  |  |  |  |  |  |  |  |  |  |  |  |  |  |  |  |  |  |  |  |  |  |  |  |  |  |  |  |  |  |  |  |  |  |  |  |  |  |  |  |  |  |  |  |  |  |  |  |  |  |  |  |  |  |  |  |  |  |  |  |  |  |  |  |  |  |  |  |  |  |  |  |  |  |  |  |  |  |  |  |  |  |  |  |  |  |  |  |  |  |  |  |  |  |  |  |  |  |  |  |  |  |  |  |  |  |  |  |  |  |  |  |  |  |  |  |  |  |  |  |  |  |  |  |  |  |  |  |  |  |  |  |  |  |  |  |  |  |  |  |  |  |  |  |  |  |  |  |  |  |  |  |  |  |  |  |  |  |  |  |  |  |  |  |  |  |  |  |  |  |  |  |  |  |  |  |  |  |  |  |  |  |  |  |  |  |  |  |  |  |  |  |  |  |  |  |  |  |  |  |  |  |  |  |  |  |  |  |  |  |  |  |  |  |  |  |  |  |  |  |  |  |  |  |  |  |  |  |  |  |  |  |  |  |  |  |  |  |  |  |  |  |  |  |  |  |  |  |  |  |  |  |  |  |  |  |  |  |  |  |  |  |  |  |  |  |  |  |  |  |  |  |  |  |  |  |  |  |  |  |  |  |  |  |  |  |  |  |  |  |  |  |  |  |  |  |  |  |  |  |  |  |  |  |  |  |  |  |  |  |  |  |  |  |  |  |  |  |  |  |  |  |  |  |  |  |  |  |  |  |  |  |  |  |  |  |  |  |  |  |  |  |  |  |  |  |  |  |  |  |  |  |  |  |  |  |  |  |  |  |  |  |  |  |  |  |  |  |  |  |  |  |  |  |  |  |  |  |  |  |  |  |  |  |  |  |  |  |  |  |  |  |  |  |  |  |  |  |  |  |  |  |  |  |  |  |  |  |  |  |  |  |  |  |  |  |  |  |  |  |  |  |  |  |  |  |  |  |  |  |  |  |  |  |  |  |  |  |  |  |  |  |  |  |  |  |  |  |  |  |  |  |  |  |  |  |  |  |  |  |  |  |  |  |  |  |  |  |  |  |  |  |  |  |  |  |  |  |  |  |  |  |  |  |  |  |  |  |  |  |  |  |  |  |  |  |  |  |  |  |  |  |  |  |  |  |  |  |  |  |  |  |  |  |  |  |  |  |  |  |  |  |  |  |  |  |  |  |  |  |  |  |  |  |  |  |  |  |  |  |  |  |  |  |  |  |  |  |  |  |  |  |  |  |  |  |  |  |  |  |  |  |  |  |  |  |  |  |  |  |  |  |  |  |  |  |  |  |  |  |  |  |  |  |  |  |  |  |  |  |  |  |  |  |  |  |  |  |  |  |  |  |  |  |  |  |  |  |  |  |  |  |  |  |  |  |  |  |  |  |  |  |  |  |  |  |  |  |  |  |  |  |  |  |  |  |  |  |  |  |  |  |  |  |  |  |  |  |  |  |  |  |  |  |  |  |  |  |  |  |  |  |  |  |  |  |  |  |  |  |  |  |  |  |  |  |  |  |  |  |  |  |  |  |  |  |  |  |  |  |  |  |  |  |  |  |  |  |  |  |  |  |  |  |  |  |  |  |  |  |  |  |  |  |  |  |  |  |  |  |  |  |  |  |  |  |  |  |  |  |  |  |  |  |  |  |  |  |  |  |  |  |  |  |  |  |  |  |  |  |  |  |  |  |  |  |  |  |  |  |  |  |  |  |  |  |  |  |  |  |  |  |  |  |  |  |  |  |  |  |  |  |  |  |  |  |  |  |  |  |  |  |  |  |  |  |  |  |  |  |  |  |  |  |  |  |  |  |  |  |  |  |  |  |  |  |  |  |  |  |  |  |  |  |  |  |  |  |  |  |  |  |  |  |  |  |  |  |  |  |  |  |  |  |  |  |  |  |  |  |  |  |  |  |  |  |  |  |  |  |  |  |  |  |  |  |  |  |  |  |  |  |  |  |  |  |  |  |  |  |  |  |  |  |  |  |  |  |  |  |  |  |  |  |  |  |  |  |  |  |  |  |  |  |  |  |  |  |  |  |  |  |  |  |  |  |  |  |  |  |  |  |  |  |  |  |  |  |  |  |  |  |  |  |  |  |  |  |  |  |  |  |  |  |  |  |  |  |  |  |  |  |  |  |  |  |  |  |  |  |  |  |  |  |  |  |  |  |  |  |  |  |  |  |  |  |  |  |  |  |  |  |  |  |  |  |  |  |  |  |  |  |  |  |  |  |  |  |  |  |  |  |  |  |  |  |  |  |  |  |  |  |  |  |  |  |  |  |  |  |  |  |  |  |  |  |  |  |  |  |  |  |  |  |  |  |  |  |  |  |  |  |  |  |  |  |  |  |  |  |  |  |  |  |  |  |  |  |  |  |  |  |  |  |  |  |  |  |  |  |  |  |  |  |  |  |  |  |  |  |  |  |  |  |  |  |  |  |  |  |  |  |  |  |  |  |  |  |  |  |  |  |  |  |  |  |  |  |  |  |  |  |  |  |  |  |  |  |  |  |  |  |  |  |  |  |  |  |  |  |  |  |  |  |  |  |  |  |  |  |  |  |  |  |  |  |  |  |  |  |  |  |  |  |  |  |  |  |  |  |  |  |  |  |  |  |  |  |  |  |  |  |  |  |  |  |  |  |  |  |  |  |  |  |  |  |  |  |  |  |  |  |  |  |  |  |  |  |  |  |  |  |  |  |  |  |  |  |  |  |  |  |  |  |  |  |  |  |  |  |  |  |  |  |  |  |  |  |  |  |  |  |  |  |  |  |  |  |  |  |  |  |  |  |  |  |  |  |  |  |  |  |  |  |  |  |  |  |  |  |  |  |  |  |  |  |  |  |  |  |  |  |  |  |  |  |  |  |  |  |  |  |  |  |  |  |  |  |  |  |  |  |  |  |  |  |  |  |  |  |  |  |  |  |  |  |  |  |  |  |  |  |  |  |  |  |  |  |  |  |  |  |  |  |  |  |  |  |  |  |  |  |  |  |  |  |  |  |  |  |  |  |  |  |  |  |  |  |  |  |  |  |  |  |  |  |  |  |  |  |  |  |  |  |  |  |  |  |  |  |  |  |  |  |  |  |  |  |  |  |  |  |  |  |  |  |  |  |  |  |  |  |  |  |  |  |  |  |  |  |  |  |  |  |  |  |  |  |  |  |  |  |  |  |  |  |  |  |  |  |  |  |  |  |  |  |  |  |  |    |
|--|--|--|--|--|--|--|--|--|--|--|--|--|--|--|--|--|--|--|--|--|--|--|--|--|--|--|--|--|--|--|--|--|--|--|--|--|--|--|--|--|--|--|--|--|--|--|--|--|--|--|--|--|--|--|--|--|--|--|--|--|--|--|--|--|--|--|--|--|--|--|--|--|--|--|--|--|--|--|--|--|--|--|--|--|--|--|--|--|--|--|--|--|--|--|--|--|--|--|--|--|--|--|--|--|--|--|--|--|--|--|--|--|--|--|--|--|--|--|--|--|--|--|--|--|--|--|--|--|--|--|--|--|--|--|--|--|--|--|--|--|--|--|--|--|--|--|--|--|--|--|--|--|--|--|--|--|--|--|--|--|--|--|--|--|--|--|--|--|--|--|--|--|--|--|--|--|--|--|--|--|--|--|--|--|--|--|--|--|--|--|--|--|--|--|--|--|--|--|--|--|--|--|--|--|--|--|--|--|--|--|--|--|--|--|--|--|--|--|--|--|--|--|--|--|--|--|--|--|--|--|--|--|--|--|--|--|--|--|--|--|--|--|--|--|--|--|--|--|--|--|--|--|--|--|--|--|--|--|--|--|--|--|--|--|--|--|--|--|--|--|--|--|--|--|--|--|--|--|--|--|--|--|--|--|--|--|--|--|--|--|--|--|--|--|--|--|--|--|--|--|--|--|--|--|--|--|--|--|--|--|--|--|--|--|--|--|--|--|--|--|--|--|--|--|--|--|--|--|--|--|--|--|--|--|--|--|--|--|--|--|--|--|--|--|--|--|--|--|--|--|--|--|--|--|--|--|--|--|--|--|--|--|--|--|--|--|--|--|--|--|--|--|--|--|--|--|--|--|--|--|--|--|--|--|--|--|--|--|--|--|--|--|--|--|--|--|--|--|--|--|--|--|--|--|--|--|--|--|--|--|--|--|--|--|--|--|--|--|--|--|--|--|--|--|--|--|--|--|--|--|--|--|--|--|--|--|--|--|--|--|--|--|--|--|--|--|--|--|--|--|--|--|--|--|--|--|--|--|--|--|--|--|--|--|--|--|--|--|--|--|--|--|--|--|--|--|--|--|--|--|--|--|--|--|--|--|--|--|--|--|--|--|--|--|--|--|--|--|--|--|--|--|--|--|--|--|--|--|--|--|--|--|--|--|--|--|--|--|--|--|--|--|--|--|--|--|--|--|--|--|--|--|--|--|--|--|--|--|--|--|--|--|--|--|--|--|--|--|--|--|--|--|--|--|--|--|--|--|--|--|--|--|--|--|--|--|--|--|--|--|--|--|--|--|--|--|--|--|--|--|--|--|--|--|--|--|--|--|--|--|--|--|--|--|--|--|--|--|--|--|--|--|--|--|--|--|--|--|--|--|--|--|--|--|--|--|--|--|--|--|--|--|--|--|--|--|--|--|--|--|--|--|--|--|--|--|--|--|--|--|--|--|--|--|--|--|--|--|--|--|--|--|--|--|--|--|--|--|--|--|--|--|--|--|--|--|--|--|--|--|--|--|--|--|--|--|--|--|--|--|--|--|--|--|--|--|--|--|--|--|--|--|--|--|--|--|--|--|--|--|--|--|--|--|--|--|--|--|--|--|--|--|--|--|--|--|--|--|--|--|--|--|--|--|--|--|--|--|--|--|--|--|--|--|--|--|--|--|--|--|--|--|--|--|--|--|--|--|--|--|--|--|--|--|--|--|--|--|--|--|--|--|--|--|--|--|--|--|--|--|--|--|--|--|--|--|--|--|--|--|--|--|--|--|--|--|--|--|--|--|--|--|--|--|--|--|--|--|--|--|--|--|--|--|--|--|--|--|--|--|--|--|--|--|--|--|--|--|--|--|--|--|--|--|--|--|--|--|--|--|--|--|--|--|--|--|--|--|--|--|--|--|--|--|--|--|--|--|--|--|--|--|--|--|--|--|--|--|--|--|--|--|--|--|--|--|--|--|--|--|--|--|--|--|--|--|--|--|--|--|--|--|--|--|--|--|--|--|--|--|--|--|--|--|--|--|--|--|--|--|--|--|--|--|--|--|--|--|--|--|--|--|--|--|--|--|--|--|--|--|--|--|--|--|--|--|--|--|--|--|--|--|--|--|--|--|--|--|--|--|--|--|--|--|--|--|--|--|--|--|--|--|--|--|--|--|--|--|--|--|--|--|--|--|--|--|--|--|--|--|--|--|--|--|--|--|--|--|--|--|--|--|--|--|--|--|--|--|--|--|--|--|--|--|--|--|--|--|--|--|--|--|--|--|--|--|--|--|--|--|--|--|--|--|--|--|--|--|--|--|--|--|--|--|--|--|--|--|--|--|--|--|--|--|--|--|--|--|--|--|--|--|--|--|--|--|--|--|--|--|--|--|--|--|--|--|--|--|--|--|--|--|--|--|--|--|--|--|--|--|--|--|--|--|--|--|--|--|--|--|--|--|--|--|--|--|--|--|--|--|--|--|--|--|--|--|--|--|--|--|--|--|--|--|--|--|--|--|--|--|--|--|--|--|--|--|--|--|--|--|--|--|--|--|--|--|--|--|--|--|--|--|--|--|--|--|--|--|--|--|--|--|--|--|--|--|--|--|--|--|--|--|--|--|--|--|--|--|--|--|--|--|--|--|--|--|--|--|--|--|--|--|--|--|--|--|--|--|--|--|--|--|--|--|--|--|--|--|--|--|--|--|--|--|--|--|--|--|--|--|--|--|--|--|--|--|--|--|--|--|--|--|--|--|--|--|--|--|--|--|--|--|--|--|--|--|--|--|--|--|--|--|--|--|--|--|--|--|--|--|--|--|--|--|--|--|--|--|--|--|--|--|--|--|--|--|--|--|--|--|--|--|--|--|--|--|--|--|--|--|--|--|--|--|--|--|--|--|--|--|--|--|--|--|--|--|--|--|--|--|--|--|--|--|--|--|--|--|--|--|--|--|--|--|--|--|--|--|--|--|--|--|--|--|--|--|--|--|--|--|--|--|--|--|--|--|--|--|--|--|--|--|--|--|--|--|--|--|--|--|--|--|--|--|--|--|--|--|--|--|--|--|--|--|--|--|--|--|--|--|--|--|--|--|--|--|--|--|--|--|--|--|--|--|--|--|--|--|--|--|--|--|--|--|--|--|--|--|--|--|--|--|--|--|--|--|--|--|--|--|--|--|--|--|--|--|--|--|--|--|--|--|--|--|--|--|--|--|--|--|--|--|--|--|--|--|--|--|--|--|--|--|--|--|--|--|--|--|--|--|--|--|--|--|--|--|--|--|--|--|--|--|--|--|--|--|--|--|--|--|--|--|--|--|--|--|--|--|--|--|--|--|--|--|--|--|--|--|--|--|--|--|--|--|--|--|--|--|--|--|--|--|--|--|--|--|--|--|--|--|--|--|--|--|--|--|--|--|--|--|--|--|--|--|--|--|--|--|--|--|--|--|--|--|--|--|--|--|--|--|--|--|--|--|--|--|--|--|--|--|--|--|--|--|--|--|--|--|--|--|--|--|--|--|--|--|--|--|----|
|  |  |  |  |  |  |  |  |  |  |  |  |  |  |  |  |  |  |  |  |  |  |  |  |  |  |  |  |  |  |  |  |  |  |  |  |  |  |  |  |  |  |  |  |  |  |  |  |  |  |  |  |  |  |  |  |  |  |  |  |  |  |  |  |  |  |  |  |  |  |  |  |  |  |  |  |  |  |  |  |  |  |  |  |  |  |  |  |  |  |  |  |  |  |  |  |  |  |  |  |  |  |  |  |  |  |  |  |  |  |  |  |  |  |  |  |  |  |  |  |  |  |  |  |  |  |  |  |  |  |  |  |  |  |  |  |  |  |  |  |  |  |  |  |  |  |  |  |  |  |  |  |  |  |  |  |  |  |  |  |  |  |  |  |  |  |  |  |  |  |  |  |  |  |  |  |  |  |  |  |  |  |  |  |  |  |  |  |  |  |  |  |  |  |  |  |  |  |  |  |  |  |  |  |  |  |  |  |  |  |  |  |  |  |  |  |  |  |  |  |  |  |  |  |  |  |  |  |  |  |  |  |  |  |  |  |  |  |  |  |  |  |  |  |  |  |  |  |  |  |  |  |  |  |  |  |  |  |  |  |  |  |  |  |  |  |  |  |  |  |  |  |  |  |  |  |  |  |  |  |  |  |  |  |  |  |  |  |  |  |  |  |  |  |  |  |  |  |  |  |  |  |  |  |  |  |  |  |  |  |  |  |  |  |  |  |  |  |  |  |  |  |  |  |  |  |  |  |  |  |  |  |  |  |  |  |  |  |  |  |  |  |  |  |  |  |  |  |  |  |  |  |  |  |  |  |  |  |  |  |  |  |  |  |  |  |  |  |  |  |  |  |  |  |  |  |  |  |  |  |  |  |  |  |  |  |  |  |  |  |  |  |  |  |  |  |  |  |  |  |  |  |  |  |  |  |  |  |  |  |  |  |  |  |  |  |  |  |  |  |  |  |  |  |  |  |  |  |  |  |  |  |  |  |  |  |  |  |  |  |  |  |  |  |  |  |  |  |  |  |  |  |  |  |  |  |  |  |  |  |  |  |  |  |  |  |  |  |  |  |  |  |  |  |  |  |  |  |  |  |  |  |  |  |  |  |  |  |  |  |  |  |  |  |  |  |  |  |  |  |  |  |  |  |  |  |  |  |  |  |  |  |  |  |  |  |  |  |  |  |  |  |  |  |  |  |  |  |  |  |  |  |  |  |  |  |  |  |  |  |  |  |  |  |  |  |  |  |  |  |  |  |  |  |  |  |  |  |  |  |  |  |  |  |  |  |  |  |  |  |  |  |  |  |  |  |  |  |  |  |  |  |  |  |  |  |  |  |  |  |  |  |  |  |  |  |  |  |  |  |  |  |  |  |  |  |  |  |  |  |  |  |  |  |  |  |  |  |  |  |  |  |  |  |  |  |  |  |  |  |  |  |  |  |  |  |  |  |  |  |  |  |  |  |  |  |  |  |  |  |  |  |  |  |  |  |  |  |  |  |  |  |  |  |  |  |  |  |  |  |  |  |  |  |  |  |  |  |  |  |  |  |  |  |  |  |  |  |  |  |  |  |  |  |  |  |  |  |  |  |  |  |  |  |  |  |  |  |  |  |  |  |  |  |  |  |  |  |  |  |  |  |  |  |  |  |  |  |  |  |  |  |  |  |  |  |  |  |  |  |  |  |  |  |  |  |  |  |  |  |  |  |  |  |  |  |  |  |  |  |  |  |  |  |  |  |  |  |  |  |  |  |  |  |  |  |  |  |  |  |  |  |  |  |  |  |  |  |  |  |  |  |  |  |  |  |  |  |  |  |  |  |  |  |  |  |  |  |  |  |  |  |  |  |  |  |  |  |  |  |  |  |  |  |  |  |  |  |  |  |  |  |  |  |  |  |  |  |  |  |  |  |  |  |  |  |  |  |  |  |  |  |  |  |  |  |  |  |  |  |  |  |  |  |  |  |  |  |  |  |  |  |  |  |  |  |  |  |  |  |  |  |  |  |  |  |  |  |  |  |  |  |  |  |  |  |  |  |  |  |  |  |  |  |  |  |  |  |  |  |  |  |  |  |  |  |  |  |  |  |  |  |  |  |  |  |  |  |  |  |  |  |  |  |  |  |  |  |  |  |  |  |  |  |  |  |  |  |  |  |  |  |  |  |  |  |  |  |  |  |  |  |  |  |  |  |  |  |  |  |  |  |  |  |  |  |  |  |  |  |  |  |  |  |  |  |  |  |  |  |  |  |  |  |  |  |  |  |  |  |  |  |  |  |  |  |  |  |  |  |  |  |  |  |  |  |  |  |  |  |  |  |  |  |  |  |  |  |  |  |  |  |  |  |  |  |  |  |  |  |  |  |  |  |  |  |  |  |  |  |  |  |  |  |  |  |  |  |  |  |  |  |  |  |  |  |  |  |  |  |  |  |  |  |  |  |  |  |  |  |  |  |  |  |  |  |  |  |  |  |  |  |  |  |  |  |  |  |  |  |  |  |  |  |  |  |  |  |  |  |  |  |  |  |  |  |  |  |  |  |  |  |  |  |  |  |  |  |  |  |  |  |  |  |  |  |  |  |  |  |  |  |  |  |  |  |  |  |  |  |  |  |  |  |  |  |  |  |  |  |  |  |  |  |  |  |  |  |  |  |  |  |  |  |  |  |  |  |  |  |  |  |  |  |  |  |  |  |  |  |  |  |  |  |  |  |  |  |  |  |  |  |  |  |  |  |  |  |  |  |  |  |  |  |  |  |  |  |  |  |  |  |  |  |  |  |  |  |  |  |  |  |  |  |  |  |  |  |  |  |  |  |  |  |  |  |  |  |  |  |  |  |  |  |  |  |  |  |  |  |  |  |  |  |  |  |  |  |  |  |  |  |  |  |  |  |  |  |  |  |  |  |  |  |  |  |  |  |  |  |  |  |  |  |  |  |  |  |  |  |  |  |  |  |  |  |  |  |  |  |  |  |  |  |  |  |  |  |  |  |  |  |  |  |  |  |  |  |  |  |  |  |  |  |  |  |  |  |  |  |  |  |  |  |  |  |  |  |  |  |  |  |  |  |  |  |  |  |  |  |  |  |  |  |  |  |  |  |  |  |  |  |  |  |  |  |  |  |  |  |  |  |  |  |  |  |  |  |  |  |  |  |  |  |  |  |  |  |  |  |  |  |  |  |  |  |  |  |  |  |  |  |  |  |  |  |  |  |  |  |  |  |  |  |  |  |  |  |  |  |  |  |  |  |  |  |  |  |  |  |  |  |  |  |  |  |  |  |  |  |  |  |  |  |  |  |  |  |  |  |  |  |  |  |  |  |  |  |  |  |  |  |  |  |  |  |  |  |  |  |  |  |  |  |  |  |  |  |  |  |  |  |  |  |  |  |  |  |  |  |  |  |  |  |  |  |  |  |  |  |  |  |  |  |  |  |  |  |  |  |  |  |  |  |  |  |  |  |  |  |  |  |  |  |  |  |  |  |  |  |  |  |  |  |  |  |  |  |  |  |  |  |  |  |  |  |  |  |  | </ |
|--|--|--|--|--|--|--|--|--|--|--|--|--|--|--|--|--|--|--|--|--|--|--|--|--|--|--|--|--|--|--|--|--|--|--|--|--|--|--|--|--|--|--|--|--|--|--|--|--|--|--|--|--|--|--|--|--|--|--|--|--|--|--|--|--|--|--|--|--|--|--|--|--|--|--|--|--|--|--|--|--|--|--|--|--|--|--|--|--|--|--|--|--|--|--|--|--|--|--|--|--|--|--|--|--|--|--|--|--|--|--|--|--|--|--|--|--|--|--|--|--|--|--|--|--|--|--|--|--|--|--|--|--|--|--|--|--|--|--|--|--|--|--|--|--|--|--|--|--|--|--|--|--|--|--|--|--|--|--|--|--|--|--|--|--|--|--|--|--|--|--|--|--|--|--|--|--|--|--|--|--|--|--|--|--|--|--|--|--|--|--|--|--|--|--|--|--|--|--|--|--|--|--|--|--|--|--|--|--|--|--|--|--|--|--|--|--|--|--|--|--|--|--|--|--|--|--|--|--|--|--|--|--|--|--|--|--|--|--|--|--|--|--|--|--|--|--|--|--|--|--|--|--|--|--|--|--|--|--|--|--|--|--|--|--|--|--|--|--|--|--|--|--|--|--|--|--|--|--|--|--|--|--|--|--|--|--|--|--|--|--|--|--|--|--|--|--|--|--|--|--|--|--|--|--|--|--|--|--|--|--|--|--|--|--|--|--|--|--|--|--|--|--|--|--|--|--|--|--|--|--|--|--|--|--|--|--|--|--|--|--|--|--|--|--|--|--|--|--|--|--|--|--|--|--|--|--|--|--|--|--|--|--|--|--|--|--|--|--|--|--|--|--|--|--|--|--|--|--|--|--|--|--|--|--|--|--|--|--|--|--|--|--|--|--|--|--|--|--|--|--|--|--|--|--|--|--|--|--|--|--|--|--|--|--|--|--|--|--|--|--|--|--|--|--|--|--|--|--|--|--|--|--|--|--|--|--|--|--|--|--|--|--|--|--|--|--|--|--|--|--|--|--|--|--|--|--|--|--|--|--|--|--|--|--|--|--|--|--|--|--|--|--|--|--|--|--|--|--|--|--|--|--|--|--|--|--|--|--|--|--|--|--|--|--|--|--|--|--|--|--|--|--|--|--|--|--|--|--|--|--|--|--|--|--|--|--|--|--|--|--|--|--|--|--|--|--|--|--|--|--|--|--|--|--|--|--|--|--|--|--|--|--|--|--|--|--|--|--|--|--|--|--|--|--|--|--|--|--|--|--|--|--|--|--|--|--|--|--|--|--|--|--|--|--|--|--|--|--|--|--|--|--|--|--|--|--|--|--|--|--|--|--|--|--|--|--|--|--|--|--|--|--|--|--|--|--|--|--|--|--|--|--|--|--|--|--|--|--|--|--|--|--|--|--|--|--|--|--|--|--|--|--|--|--|--|--|--|--|--|--|--|--|--|--|--|--|--|--|--|--|--|--|--|--|--|--|--|--|--|--|--|--|--|--|--|--|--|--|--|--|--|--|--|--|--|--|--|--|--|--|--|--|--|--|--|--|--|--|--|--|--|--|--|--|--|--|--|--|--|--|--|--|--|--|--|--|--|--|--|--|--|--|--|--|--|--|--|--|--|--|--|--|--|--|--|--|--|--|--|--|--|--|--|--|--|--|--|--|--|--|--|--|--|--|--|--|--|--|--|--|--|--|--|--|--|--|--|--|--|--|--|--|--|--|--|--|--|--|--|--|--|--|--|--|--|--|--|--|--|--|--|--|--|--|--|--|--|--|--|--|--|--|--|--|--|--|--|--|--|--|--|--|--|--|--|--|--|--|--|--|--|--|--|--|--|--|--|--|--|--|--|--|--|--|--|--|--|--|--|--|--|--|--|--|--|--|--|--|--|--|--|--|--|--|--|--|--|--|--|--|--|--|--|--|--|--|--|--|--|--|--|--|--|--|--|--|--|--|--|--|--|--|--|--|--|--|--|--|--|--|--|--|--|--|--|--|--|--|--|--|--|--|--|--|--|--|--|--|--|--|--|--|--|--|--|--|--|--|--|--|--|--|--|--|--|--|--|--|--|--|--|--|--|--|--|--|--|--|--|--|--|--|--|--|--|--|--|--|--|--|--|--|--|--|--|--|--|--|--|--|--|--|--|--|--|--|--|--|--|--|--|--|--|--|--|--|--|--|--|--|--|--|--|--|--|--|--|--|--|--|--|--|--|--|--|--|--|--|--|--|--|--|--|--|--|--|--|--|--|--|--|--|--|--|--|--|--|--|--|--|--|--|--|--|--|--|--|--|--|--|--|--|--|--|--|--|--|--|--|--|--|--|--|--|--|--|--|--|--|--|--|--|--|--|--|--|--|--|--|--|--|--|--|--|--|--|--|--|--|--|--|--|--|--|--|--|--|--|--|--|--|--|--|--|--|--|--|--|--|--|--|--|--|--|--|--|--|--|--|--|--|--|--|--|--|--|--|--|--|--|--|--|--|--|--|--|--|--|--|--|--|--|--|--|--|--|--|--|--|--|--|--|--|--|--|--|--|--|--|--|--|--|--|--|--|--|--|--|--|--|--|--|--|--|--|--|--|--|--|--|--|--|--|--|--|--|--|--|--|--|--|--|--|--|--|--|--|--|--|--|--|--|--|--|--|--|--|--|--|--|--|--|--|--|--|--|--|--|--|--|--|--|--|--|--|--|--|--|--|--|--|--|--|--|--|--|--|--|--|--|--|--|--|--|--|--|--|--|--|--|--|--|--|--|--|--|--|--|--|--|--|--|--|--|--|--|--|--|--|--|--|--|--|--|--|--|--|--|--|--|--|--|--|--|--|--|--|--|--|--|--|--|--|--|--|--|--|--|--|--|--|--|--|--|--|--|--|--|--|--|--|--|--|--|--|--|--|--|--|--|--|--|--|--|--|--|--|--|--|--|--|--|--|--|--|--|--|--|--|--|--|--|--|--|--|--|--|--|--|--|--|--|--|--|--|--|--|--|--|--|--|--|--|--|--|--|--|--|--|--|--|--|--|--|--|--|--|--|--|--|--|--|--|--|--|--|--|--|--|--|--|--|--|--|--|--|--|--|--|--|--|--|--|--|--|--|--|--|--|--|--|--|--|--|--|--|--|--|--|--|--|--|--|--|--|--|--|--|--|--|--|--|--|--|--|--|--|--|--|--|--|--|--|--|--|--|--|--|--|--|--|--|--|--|--|--|--|--|--|--|--|--|--|--|--|--|--|--|--|--|--|--|--|--|--|--|--|--|--|--|--|--|--|--|--|--|--|--|--|--|--|--|--|--|--|--|--|--|--|--|--|--|--|--|--|--|--|--|--|--|--|--|--|--|--|--|--|--|--|--|--|--|--|--|--|--|--|--|--|--|--|--|--|--|--|--|--|--|--|--|--|--|--|--|--|--|--|--|--|--|--|--|--|--|--|--|--|--|--|--|--|--|--|--|--|--|--|--|--|--|--|--|--|--|--|--|--|--|--|--|--|--|--|--|--|--|--|--|----|

|      |     |                 |                     |                         |                                                |                                                                                                                                                                    |
|------|-----|-----------------|---------------------|-------------------------|------------------------------------------------|--------------------------------------------------------------------------------------------------------------------------------------------------------------------|
|      |     |                 |                     |                         |                                                | Salvia leucantha                                                                                                                                                   |
|      |     | A <sub>R</sub>  | 560-760             |                         |                                                | A <sub>R</sub><br>-Plant height +8%<br>-Internodes length -14%<br>-Leaf area -8%<br>-Number of flowers +5%<br>-Leaves dry weight -15%<br>-Stem dry weight -22%     |
|      |     |                 |                     | Salvia leucantha        |                                                | Salvia leucantha                                                                                                                                                   |
|      |     | A <sub>FR</sub> | 680-850             |                         |                                                | A <sub>FR</sub><br>-Plant height -22%<br>-Internodes length -15%<br>-Leaf area -18%<br>-Number of flowers +26%<br>-Leaves dry weight -25%<br>-Stem dry weight -35% |
| [12] | PVC | YXE-10          | 680-840<br>900-1000 | Pachystachys lutea      | -PPFD 515 μmol m <sup>-2</sup> s <sup>-1</sup> | YXE-10<br>-Plant height -15%<br>-Internodes length -8%<br>-Leaf area -15%<br>-Leaves dry weight -23%<br>-Stem dry weight -25%<br>-Root dry weight 0%               |
|      |     |                 |                     | Strobilanthes dyerianus | -Temperature 35 °C                             | SXE-4                                                                                                                                                              |
|      |     |                 |                     | Orthosiphon stamineus   | -Experiment 6 weeks                            | -Plant height+6%<br>-Internodes length +6%<br>-Leaf area-5%<br>-Leaves dry weight -5%<br>-Stem dry weight 0%<br>-Root dry weight 0%                                |
|      |     | SXE-4           | 640-760             |                         |                                                |                                                                                                                                                                    |
| [13] | PVC | SXE-4           | 640-760             | Eustoma grandiflorum    | -Photoperiod 12 h                              | SXE-4 Dye:                                                                                                                                                         |

|  |  |  |  |  |                                                    |                            |
|--|--|--|--|--|----------------------------------------------------|----------------------------|
|  |  |  |  |  | -PPFD 500<br>μmol m <sup>-2</sup> s <sup>-11</sup> | -Plant height<br>+10%      |
|  |  |  |  |  | -Temperature<br>35/16 °C                           | -Internodes<br>length +4%  |
|  |  |  |  |  | -Experiment<br>8 weeks                             | -Leaves dry<br>weight -6%  |
|  |  |  |  |  |                                                    | -Stem dry<br>weight 0%     |
|  |  |  |  |  |                                                    | -Root dry<br>weight -16%   |
|  |  |  |  |  |                                                    |                            |
|  |  |  |  |  |                                                    | YXE-10 Dye                 |
|  |  |  |  |  |                                                    | -Plant height -<br>5%      |
|  |  |  |  |  |                                                    | -Internodes<br>length -11% |
|  |  |  |  |  |                                                    | -Leaves dry<br>weight -12% |
|  |  |  |  |  |                                                    | -Stem dry<br>weight -29%   |
|  |  |  |  |  |                                                    | -Root dry<br>weight -13%   |
|  |  |  |  |  |                                                    |                            |
|  |  |  |  |  |                                                    | <i>Zinnia elegans</i>      |
|  |  |  |  |  |                                                    | A <sub>R</sub>             |
|  |  |  |  |  |                                                    | -Stem length<br>+7%        |
|  |  |  |  |  |                                                    | -Dry weight -<br>10%       |
|  |  |  |  |  |                                                    | -Flower<br>diameter 0%     |
|  |  |  |  |  |                                                    |                            |
|  |  |  |  |  |                                                    | <i>Zinnia elegans</i>      |
|  |  |  |  |  |                                                    | A <sub>FR</sub>            |
|  |  |  |  |  |                                                    | -Stem length-<br>20%       |
|  |  |  |  |  |                                                    | -Dry weight -<br>26%       |
|  |  |  |  |  |                                                    | -Flower<br>diameter 0%     |
|  |  |  |  |  |                                                    |                            |
|  |  |  |  |  |                                                    | <i>Cosmos</i>              |
|  |  |  |  |  |                                                    | <i>bipinnatus</i>          |
|  |  |  |  |  |                                                    | A <sub>R</sub>             |
|  |  |  |  |  |                                                    | -Stem length 0%            |
|  |  |  |  |  |                                                    | -Dry weight -<br>18%       |
|  |  |  |  |  |                                                    | -Flower<br>diameter -7%    |
|  |  |  |  |  |                                                    |                            |
|  |  |  |  |  |                                                    | <i>Cosmos</i>              |
|  |  |  |  |  |                                                    | <i>bipinnatus</i>          |
|  |  |  |  |  |                                                    | A <sub>FR</sub>            |
|  |  |  |  |  |                                                    | -Stem length -<br>9%       |
|  |  |  |  |  |                                                    | -Dry weight -<br>29%       |
|  |  |  |  |  |                                                    | -Flower<br>diameter 0%     |
|  |  |  |  |  |                                                    |                            |
|  |  |  |  |  |                                                    | <i>Dendranthem</i>         |
|  |  |  |  |  |                                                    | <i>a</i>                   |
|  |  |  |  |  |                                                    | <i>grandiflorum</i>        |
|  |  |  |  |  |                                                    | A <sub>R</sub>             |



|  |  |  |  |                                      |
|--|--|--|--|--------------------------------------|
|  |  |  |  | -Stem length<br>+5%                  |
|  |  |  |  | -Dry weight -8%                      |
|  |  |  |  | -Flower<br>diameter 0%               |
|  |  |  |  |                                      |
|  |  |  |  | <i>Dendranthema<br/>grandiflorum</i> |
|  |  |  |  | A <sub>FR</sub>                      |
|  |  |  |  | -Stem length -<br>11%                |
|  |  |  |  | -Dry weight -<br>22%                 |
|  |  |  |  | -Flower<br>diameter 0%               |
|  |  |  |  |                                      |
|  |  |  |  | <i>Antirrhinum<br/>majus</i>         |
|  |  |  |  | A <sub>R</sub>                       |
|  |  |  |  | -Stem length<br>+11%                 |
|  |  |  |  | -Dry weight 0%                       |
|  |  |  |  |                                      |
|  |  |  |  | <i>Antirrhinum<br/>majus</i>         |
|  |  |  |  | A <sub>FR</sub>                      |
|  |  |  |  | -Stem length 0%                      |
|  |  |  |  | -Dry weight -<br>21%                 |
|  |  |  |  |                                      |
|  |  |  |  | <i>Petunia hybrida</i>               |
|  |  |  |  | A <sub>R</sub>                       |
|  |  |  |  | -Dry weight -6%                      |
|  |  |  |  | -Flower<br>diameter 0%               |
|  |  |  |  |                                      |
|  |  |  |  | <i>Petunia hybrida</i>               |
|  |  |  |  | A <sub>FR</sub>                      |
|  |  |  |  | -Dry weight -<br>27%                 |
|  |  |  |  | -Flower<br>diameter 0%               |
|  |  |  |  |                                      |
|  |  |  |  | <i>Rosa hybrida</i>                  |
|  |  |  |  | A <sub>R</sub>                       |
|  |  |  |  | -Stem length 0%                      |
|  |  |  |  | -Dry weight 0%                       |
|  |  |  |  | -Flower<br>diameter 0%               |
|  |  |  |  |                                      |
|  |  |  |  | <i>Rosa hybrida</i>                  |
|  |  |  |  | A <sub>FR</sub>                      |
|  |  |  |  | -Stem length -<br>6%                 |
|  |  |  |  | -Dry weight -<br>10%                 |
|  |  |  |  | -Flower<br>diameter 0%               |

|      |    |            |                 |                          |                                                                                                                                                                                                                                                |
|------|----|------------|-----------------|--------------------------|------------------------------------------------------------------------------------------------------------------------------------------------------------------------------------------------------------------------------------------------|
|      |    |            |                 |                          | Red #026<br>-Chlorophyll content -25%<br>-Total proteins -28%<br>-APX (ascorbate peroxidase) +20%<br>-CAT (catalase) -22%<br>-Dissolved sugar content +92%<br>-MDA (malonic dialdehyde) +40%<br>-TNC (total non-structural carbohydrates) +14% |
| [15] | PE | Red #026   | <580            |                          |                                                                                                                                                                                                                                                |
|      |    | Blue #075  | 500-650         | <i>Triticum aestivum</i> | Blue #075<br>-Chlorophyll content -10%<br>-Total proteins 0%<br>-APX (ascorbate peroxidase) -10%<br>-CAT (catalase) 0%<br>-Dissolved sugar content +38%<br>-MDA (malonic dialdehyde) +14%<br>-TNC (total non-structural carbohydrates): 0%     |
|      |    | Green #089 | <450<br>550-700 |                          | Green #089<br>-Chlorophyll content -30%<br>-Total proteins B -28%<br>-APX (ascorbate peroxidase) 0%<br>-CAT (catalase) -9%<br>-Dissolved sugar content +57%<br>-MDA (malonic dialdehyde) +40%<br>-TNC (total non-structural carbohydrates) 0%  |
| [16] | PE | Red        | 550-700         | <i>Eruca sativa</i>      | Red                                                                                                                                                                                                                                            |

|      |                        |               |                                           |                                                                                                                                                                                                       |
|------|------------------------|---------------|-------------------------------------------|-------------------------------------------------------------------------------------------------------------------------------------------------------------------------------------------------------|
|      |                        |               | <i>Lactuca sativa</i>                     | -Fresh weight +8%<br>-Dry weight +14%<br>-Nitrates content +67%<br>-Chlorophyll a content +25%<br>-Chlorophyll b content +30%<br>-Chlorophyll a+b content 0%<br>-Carotenoids content 0%               |
|      |                        |               | -Temperature 25 °C<br>-Experiment 3 month | Yellow<br>-Fresh weight +13%<br>-Dry weight +10%<br>-Nitrates content +77%<br>-Chlorophyll a content 0%<br>-Chlorophyll b content 0%<br>-Chlorophyll a+b content -13%<br>-Carotenoids content +60%    |
|      |                        | Yellow        |                                           |                                                                                                                                                                                                       |
| [17] | Ethylene vinyl acetate |               | <i>Beta vulgaris</i>                      | -Root dry weight -5%<br>-Root diameter 0%<br>-Leaves dry weight -9%<br>-TPC (total phenol content) 0%<br>-Antioxidant activity 0%<br>-Total concentration of pigments -15%<br>-Total sugar content 0% |
|      |                        | RED <400      |                                           |                                                                                                                                                                                                       |
|      |                        |               | -Temperature 31 °C<br>-Experiment 65 days | GREEN<br>-Root dry weight -200%<br>-Root diameter -26%<br>-Leaves dry weight -40%<br>-TPC (total phenol content) -35%<br>-Antioxidant activity -45%                                                   |
|      |                        | GREEN 600-750 |                                           |                                                                                                                                                                                                       |

|      |    |                 |                             |                                                       |                                                |                                 |
|------|----|-----------------|-----------------------------|-------------------------------------------------------|------------------------------------------------|---------------------------------|
|      |    |                 |                             |                                                       | -Total concentration of pigments -100%         |                                 |
|      |    |                 |                             |                                                       | -Total sugar content +11%                      |                                 |
|      |    |                 |                             |                                                       | Solatrol                                       |                                 |
|      |    |                 |                             |                                                       | -Plant height -36%                             |                                 |
|      |    |                 |                             |                                                       | -Leaves number -20%                            |                                 |
|      |    |                 |                             |                                                       | -Leaf area -31%                                |                                 |
|      |    |                 |                             |                                                       | -Dry weight -35%                               |                                 |
| [18] | PE | Solatrol        | 640-800                     | <i>Petunia hybrida</i><br><i>Impatiens walleriana</i> | -PPFD 800 $\mu\text{mol m}^{-2} \text{s}^{-1}$ | -Plant height -39%              |
|      |    |                 |                             |                                                       | -Temperature 17 °C                             | -Leaves number -37%             |
|      |    |                 |                             |                                                       |                                                | -Leaf area -100%                |
|      |    |                 |                             |                                                       |                                                | -Dry weight -140%               |
|      |    |                 |                             |                                                       |                                                |                                 |
|      |    |                 |                             |                                                       |                                                |                                 |
|      |    |                 |                             |                                                       |                                                |                                 |
|      |    |                 |                             |                                                       |                                                |                                 |
|      |    |                 |                             |                                                       |                                                |                                 |
|      |    |                 |                             |                                                       |                                                |                                 |
|      |    | Chromagrow      | 640-1000                    |                                                       |                                                | XL Blue                         |
|      |    |                 |                             |                                                       | -Plant height -18%                             |                                 |
|      |    |                 |                             |                                                       | -Leaves number -37%                            |                                 |
|      |    |                 |                             |                                                       | -Leaf area -40%                                |                                 |
|      |    |                 |                             |                                                       | -Dry weight -100%                              |                                 |
| [19] | PE | A <sub>R</sub>  | 550-720                     | <i>Chrysanthemum morifolium</i>                       | -Photoperiod 16 h                              | A <sub>R</sub>                  |
|      |    |                 |                             |                                                       | -Temperature 20 °C                             | -Plant height +23%              |
|      |    |                 |                             |                                                       | -Experiment 40 days                            | -Leaf area -10%                 |
|      |    |                 |                             |                                                       |                                                |                                 |
|      |    |                 |                             |                                                       |                                                |                                 |
|      |    |                 |                             |                                                       |                                                |                                 |
|      |    | A <sub>FR</sub> | 640-760                     |                                                       |                                                | A <sub>FR</sub>                 |
|      |    |                 |                             |                                                       | -Plant height -12%                             |                                 |
|      |    |                 |                             |                                                       | -Leaf area 0%                                  |                                 |
| [20] | PE | FRabs           | 700-800                     | <i>Rubus idaeus</i>                                   | -Photoperiod 16 h                              | -Dry weight -5%                 |
|      |    |                 |                             |                                                       | -PPFD 135 $\mu\text{mol m}^{-2} \text{s}^{-1}$ | -Number of generative shoots 0% |
|      |    |                 |                             |                                                       | -Temperature 18/15 °C                          | -Number of flowers +14%         |
|      |    |                 |                             |                                                       | -Experiment 4 month                            | -Yield per plant +13%           |
|      |    |                 |                             |                                                       |                                                | -Number of berries +13%         |
|      |    |                 |                             |                                                       |                                                | -Average berry weight 0%        |
|      |    |                 |                             |                                                       |                                                |                                 |
|      |    |                 |                             |                                                       |                                                |                                 |
| [21] |    | 300-400         | <i>Arabidopsis thaliana</i> | -PPFD 120 $\mu\text{mol m}^{-2} \text{s}^{-1}$        | -Fresh weight +25%                             |                                 |
|      |    | 700-900         |                             | -Temperature 22 °C                                    | -Dry weight +20%                               |                                 |
|      |    |                 |                             |                                                       |                                                |                                 |

|                        |                                                                                                                                                                                                                                                                                          |
|------------------------|------------------------------------------------------------------------------------------------------------------------------------------------------------------------------------------------------------------------------------------------------------------------------------------|
| -Experiment<br>4 weeks | -Fv/Fm<br>(photochemical<br>efficiency) 0%<br>-FPSII (quantum<br>yield of<br>photosystem II)<br>0%<br>-NPQ (non-<br>photochemical<br>quenching) 0%<br>-P700 oxidation<br>level +30%<br>-ATP<br>production<br>+26%<br>-NADP products<br>0%<br>-Assimilation<br>rate CO <sub>2</sub> + 37% |
|------------------------|------------------------------------------------------------------------------------------------------------------------------------------------------------------------------------------------------------------------------------------------------------------------------------------|

PVC – polyvinyl chloride, PP – polycarbonate panel, PPFD – photosynthetic photon flux density, Fv/Fm – photochemical efficiency, FPSII – quantum yield of photosystem II, NPQ – non-photochemical quenching, TPC – total phenol content.

## References

- McMahon, M.J.; Kelly, J.W.; Decoteau, D.R.; Young, R.E.; Pollock, R.K. Growth of *Dendranthema ×grandiflorum* (Ramat.) Kitamura under Various Spectral Filters. *Journal of the American Society for Horticultural Science* **1991**, *116*, 950–954, doi:10.21273/JASHS.116.6.950.
- Rajapakse, N.C.; Pollock, R.K.; McMahon, M.J.; Kelly, J.W.; Young, R.E. Interpretation of Light Quality Measurements and Plant Response in Spectral Filter Research. *HortScience* **1992**, *27*, 1208–1211, doi:10.21273/HORTSCI.27.11.1208.
- Rajapakse, N.C.; Kelly, J.W. Regulation of Chrysanthemum Growth by Spectral Filters. *Journal of the American Society for Horticultural Science* **1992**, *117*, 481–485, doi:10.21273/JASHS.117.3.481.
- Rajapakse, N.C.; Kelly, J.W. Influence of Spectral Filters on Growth and Postharvest Quality of Potted Miniature Roses. *Scientia Horticulturae* **1994**, *56*, 245–255, doi:10.1016/0304-4238(94)90006-X.
- Murakami, K.; Cui, H.; Kiyota, M.; Aiga, I.; Yamane, T. Control of Plant Growth by Covering Materials for Greenhouses Which Alter the Spectral Distribution of Transmitted Light. *Acta Horticulturae* **1997**, *435*, 123–130, doi:10.17660/ACTAHORTIC.1997.435.11.
- Haeringen, C.J. van; West, J.S.; Davis, F.J.; Gilbert, A.; Hadley, P.; Pearson, S.; Wheldon, A.E.; Henbest, R.G.C. The Development of Solid Spectral Filters for the Regulation of Plant Growth. *Photochemistry and Photobiology* **1998**, *67*, 407–413, doi:10.1111/J.1751-1097.1998.TB05219.X.
- Noè, N.; Eccher, T.; del Signore, E.; Montoldi, A. Growth and Proliferation in Vitro of *Vaccinium Corymbosum* under Different Irradiance and Radiation Spectral Composition. *Biologia Plantarum* **1998**, *41:2*, 161–167, doi:10.1023/A:1001878901718.
- Oyaert, E.; Volckaert, E.; Debergh, P.C. Growth of Chrysanthemum under Coloured Plastic Films with Different Light Qualities and Quantities. *Scientia Horticulturae* **1999**, *79*, 195–205, doi:10.1016/S0304-4238(98)00207-6.
- Li, E.H. Material Parameters of InGaAsP and InAlGaAs Systems for Use in Quantum Well Structures at Low and Room Temperatures. *Physica E: Low-dimensional Systems and Nanostructures* **2000**, *5*, 215–273, doi:10.1016/S1386-9477(99)00262-3.
- Patil, G. G.; Oi, R.; Gissinger, A.; Moe, R. Plant Morphology Is Affected by Light Quality Selective Plastic Films and Alternating Day and Night Temperature. *Gartenbauwissenschaft* **2001**, 53–60.

11. Wilson, S.B.; Rajapakse, N.C. Use of Photosensitive Plastic Films to Control Growth of Three Perennial Salvias. *J. Appl. Hort* **2002**, *3*, 71–74.
12. Wilson, S.B.; Rajapakse, N.C. Growth Regulation of Sub-Tropical Perennials by Photosensitive Plastic Films. *Journal of Environmental Horticulture* **2001**, *19*, 65–68, doi:10.24266/0738-2898-19.2.65.
13. Wilson, S.B.; Rajapakse, N.C. Growth Control of Lisianthus by Photosensitive Plastic Films. *Horttechnology* **2001**, *11*, 581–584, doi:10.21273/HORTTECH.11.4.581.
14. Cerny, T.A.; Faust, J.E.; Layne, D.R.; Rajapakse, N.C. Influence of Photosensitive Films and Growing Season on Stem Growth and Flowering of Six Plant Species. *Journal of the American Society for Horticultural Science* **2003**, *128*, 486–491, doi:10.21273/JASHS.128.4.0486.
15. Causin, H.F.; Jauregui, R.N.; Barneix, A.J. The Effect of Light Spectral Quality on Leaf Senescence and Oxidative Stress in Wheat. *Plant Science* **2006**, *171*, 24–33, doi:10.1016/J.PLANTSCI.2006.02.009.
16. Magnani, G.; Filippi, F.; Borghesi, E.; Vitale, M. Impact of Sunlight Spectrum Modification on Yield and Quality of Ready-to-Use Lettuce and Rocket Salad Grown on Floating System. *Acta Horticulturae* **2008**, *801 PART 1*, 163–169, doi:10.17660/ACTAHORTIC.2008.801.13.
17. Stagnari, F.; Galieni, A.; Cafiero, G.; Pisante, M. Application of Photo-Selective Films to Manipulate Wavelength of Transmitted Radiation and Photosynthate Composition in Red Beet (*Beta Vulgaris* Var. *Conditiva Alef.*). *Journal of the Science of Food and Agriculture* **2014**, *94*, 713–720, doi:10.1002/JSFA.6312.
18. Fletcher, J.M.; Tatsiopoulou, A.; Mpezamihigo, M.; Carew, J.G.; Henbest, R.G.C.; Hadley, P. Far-Red Light Filtering by Plastic Film, Greenhouse-Cladding Materials: Effects on Growth and Flowering in Petunia and Impatiens. **2015**, *80*, 303–306, doi:10.1080/14620316.2005.11511934.
19. Khattak, A.M.; Pearson, S.; Johnson, C.B. The Effect of Spectral Filters and Nitrogen Dose on the Growth of Chrysanthemum (*Chrysanthemum Morifolium* Ramat., Cv. *Snowdon*). **2015**, *74*, 206–212, doi:10.1080/14620316.1999.11511096.
20. Palonen, P.; Karhu, S.; Savelainen, H.; Rantanen, M.; Junttila, O. Growth and Cropping of Primocane and Biennial Raspberry Cultivars Grown under a Film Absorbing Far-Red Light. **2015**, *86*, 113–119, doi:10.1080/14620316.2011.11512735.
21. Li, Y.; Tu, W.; Liu, C.; Liu, W.; Hu, G.; Liu, X.; Chen, Z.; Yang, C. Light Conversion Film Promotes CO<sub>2</sub> Assimilation by Increasing Cyclic Electron Flow around Photosystem I in *Arabidopsis Thaliana*. *International Journal of Hydrogen Energy* **2017**, *42*, 8545–8553, doi:10.1016/J.IJHYDENE.2017.01.108.
